# Supplementary material for: Single Cell Analysis Reveals the Stochastic Phase of Reprogramming to Pluripotency Is an Ordered Probabilistic Process
Source: PubMed Central journal article supplement (PMC3990627; doi:10.1371/journal.pone.0095304), 2014-04-17
Supplement: pone.0095304.s001.pdf [file pone.0095304.s001.pdf]

Figure S1

A

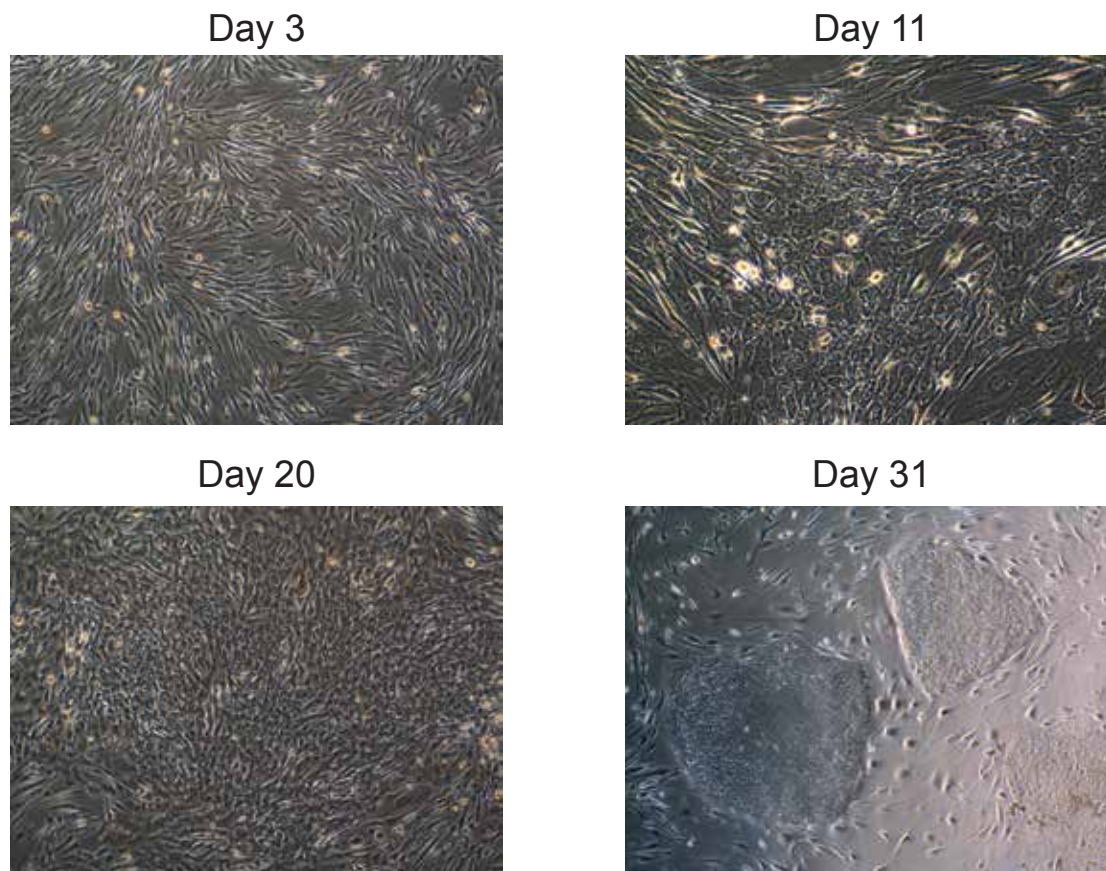

B

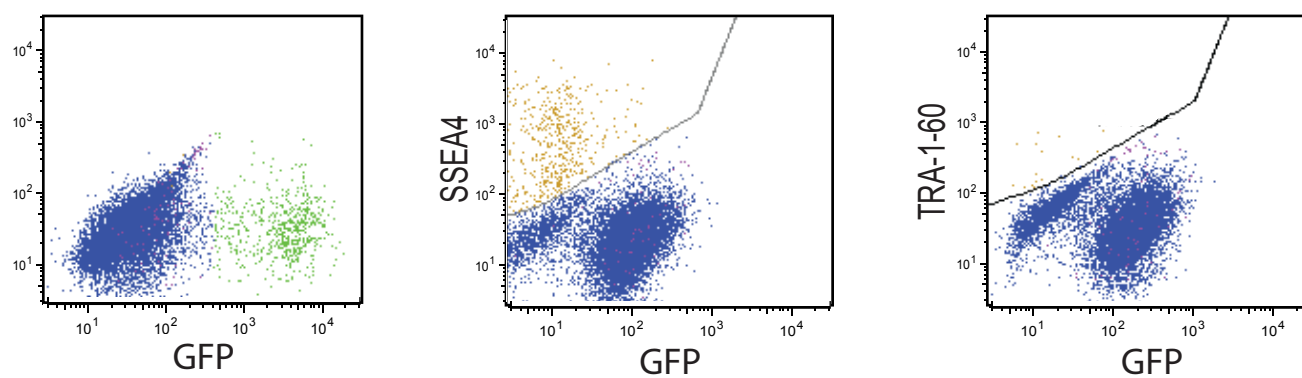

**Figure S1:** Overview of Experimental Design

(A) Representative images of Human MRC-5 cells undergoing reprogramming at indicated time points post-infection with OSKM virus. (B) Representative FACS plots showing the gating scheme used for the isolation of GFP<sup>+</sup>, SSEA4<sup>+</sup> and TRA-1-60<sup>+</sup> cells.
