# Supplementary material for: Single Cell Analysis Reveals the Stochastic Phase of Reprogramming to Pluripotency Is an Ordered Probabilistic Process
Source: PubMed Central journal article supplement (PMC3990627; doi:10.1371/journal.pone.0095304), 2014-04-17
Supplement: pone.0095304.s002.pdf [file pone.0095304.s002.pdf]

Figure S2

Pluripotency

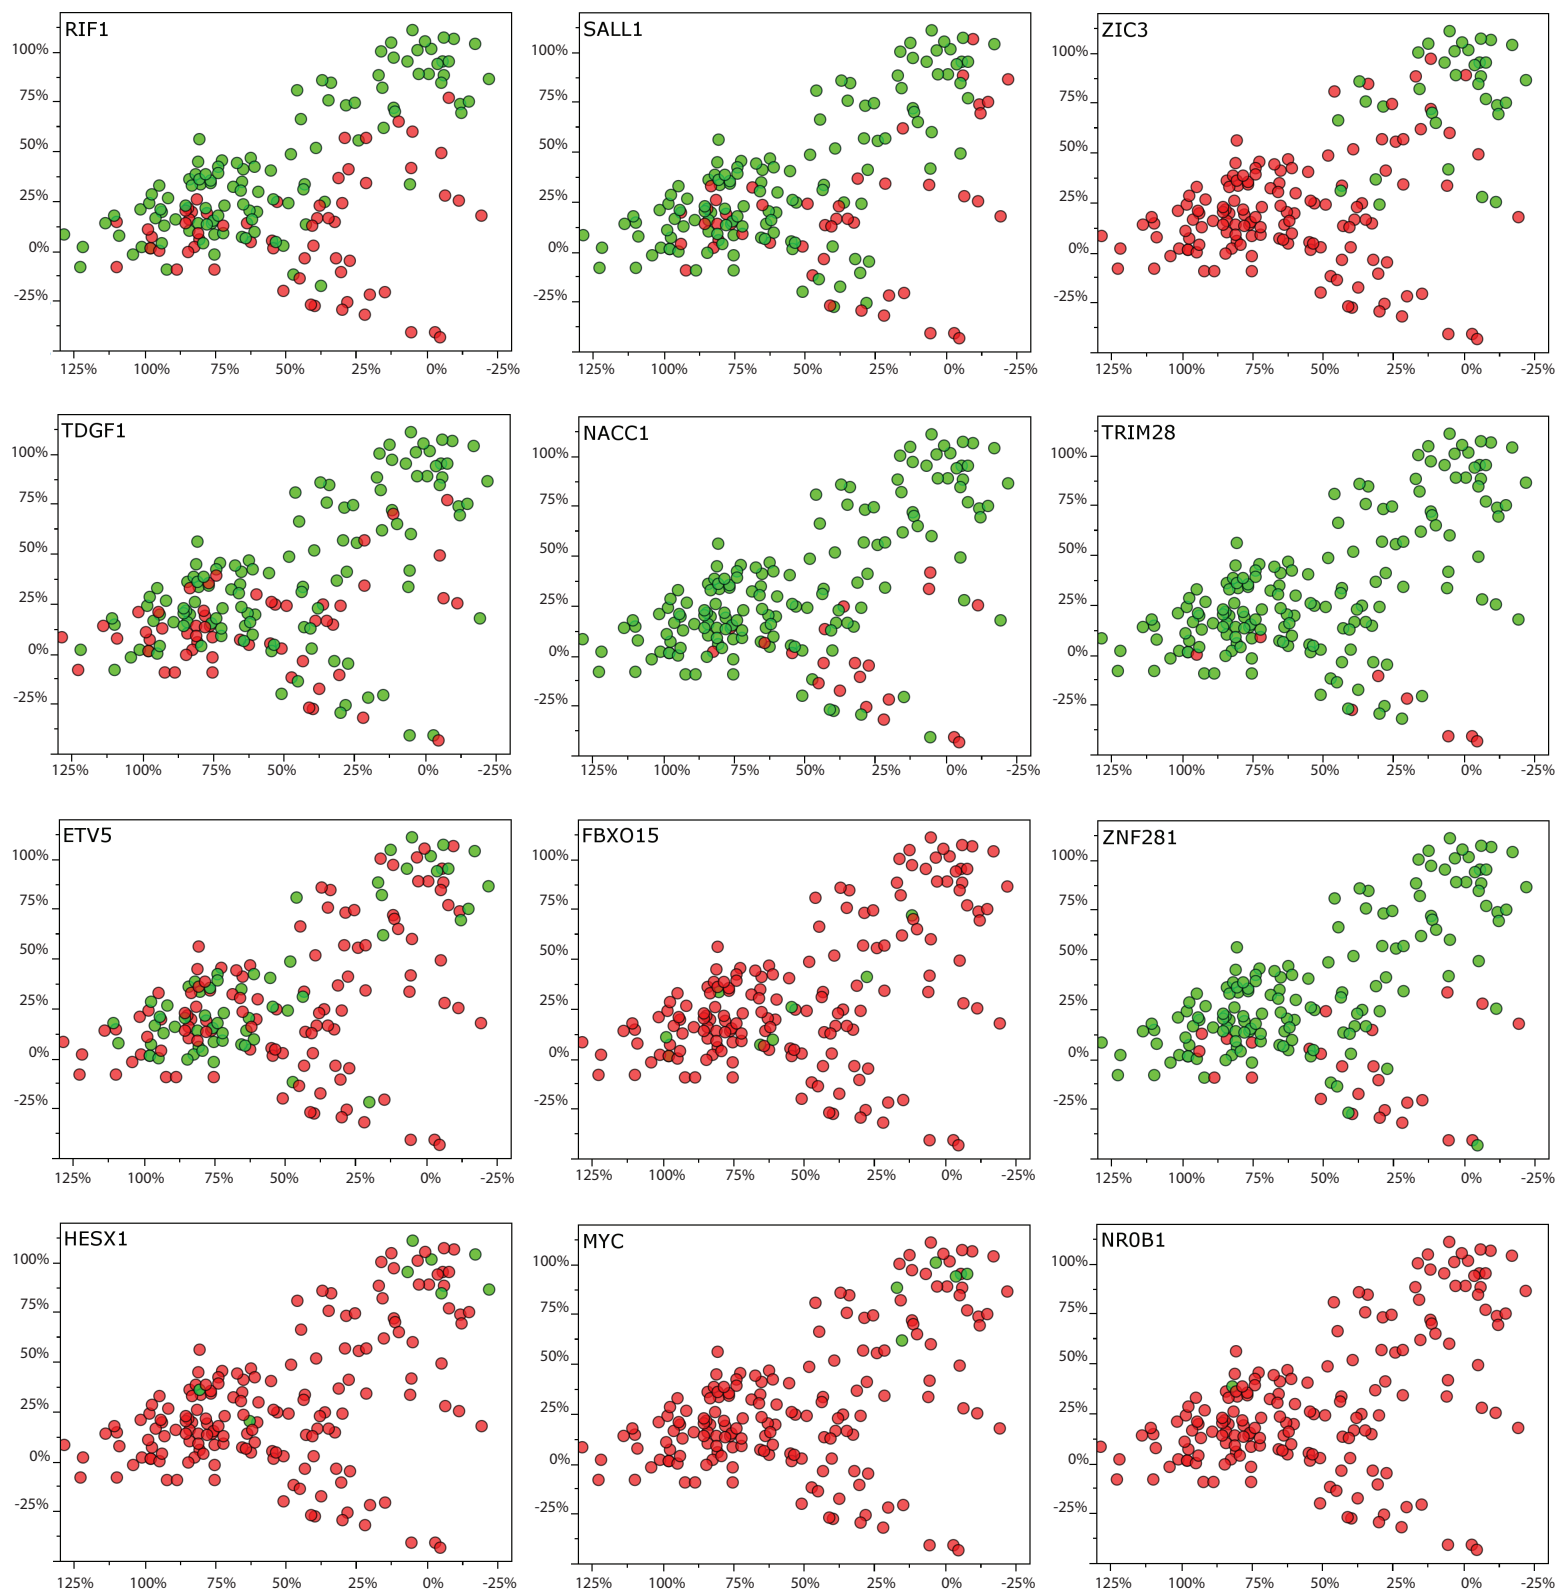

# Pluripotency

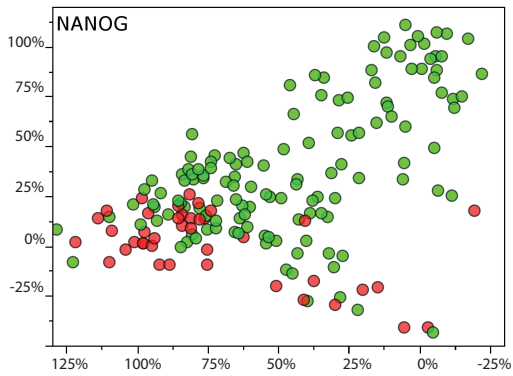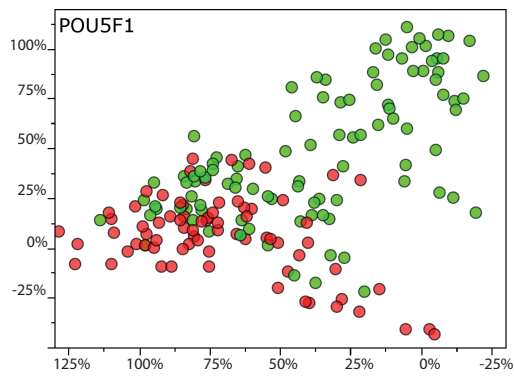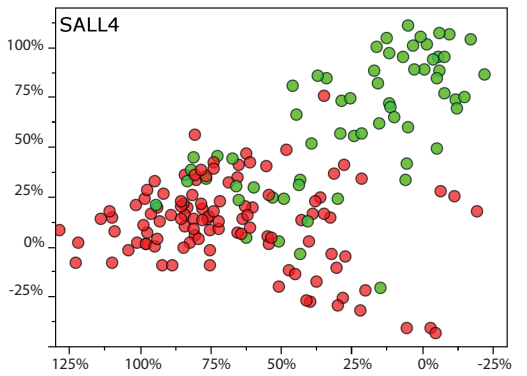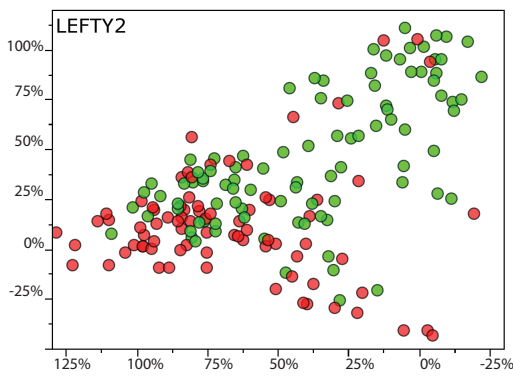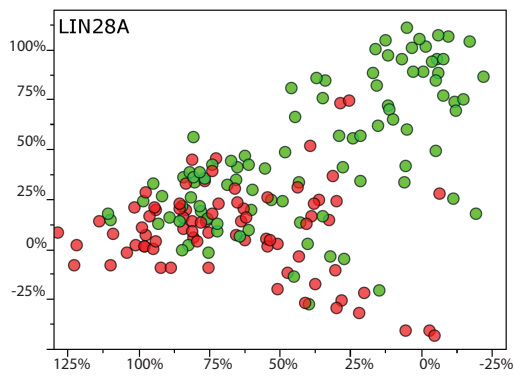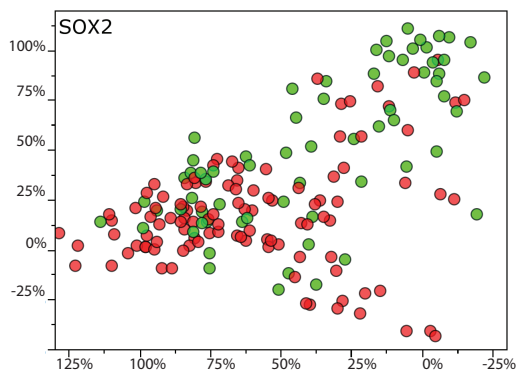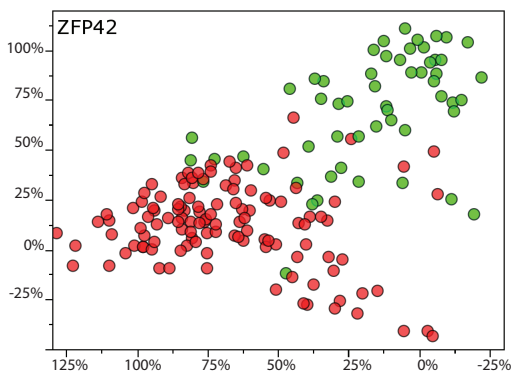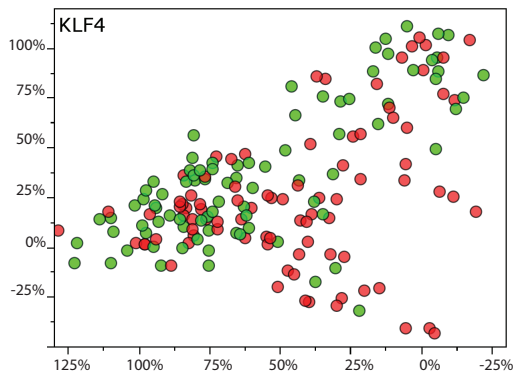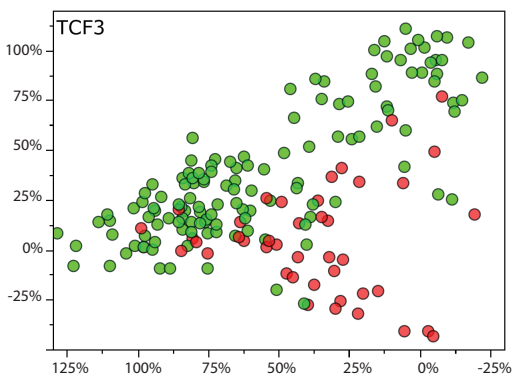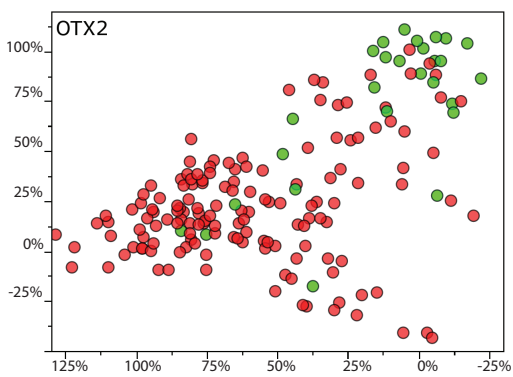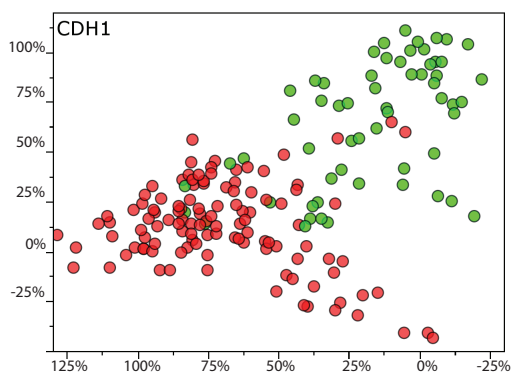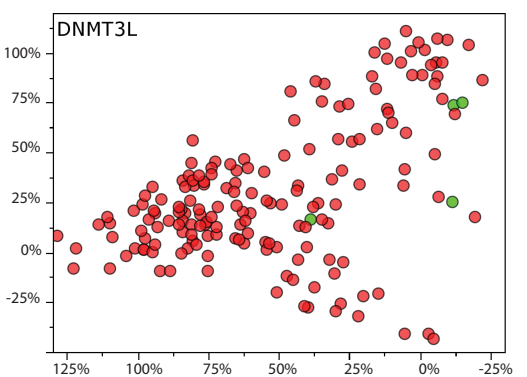

## Fibroblast

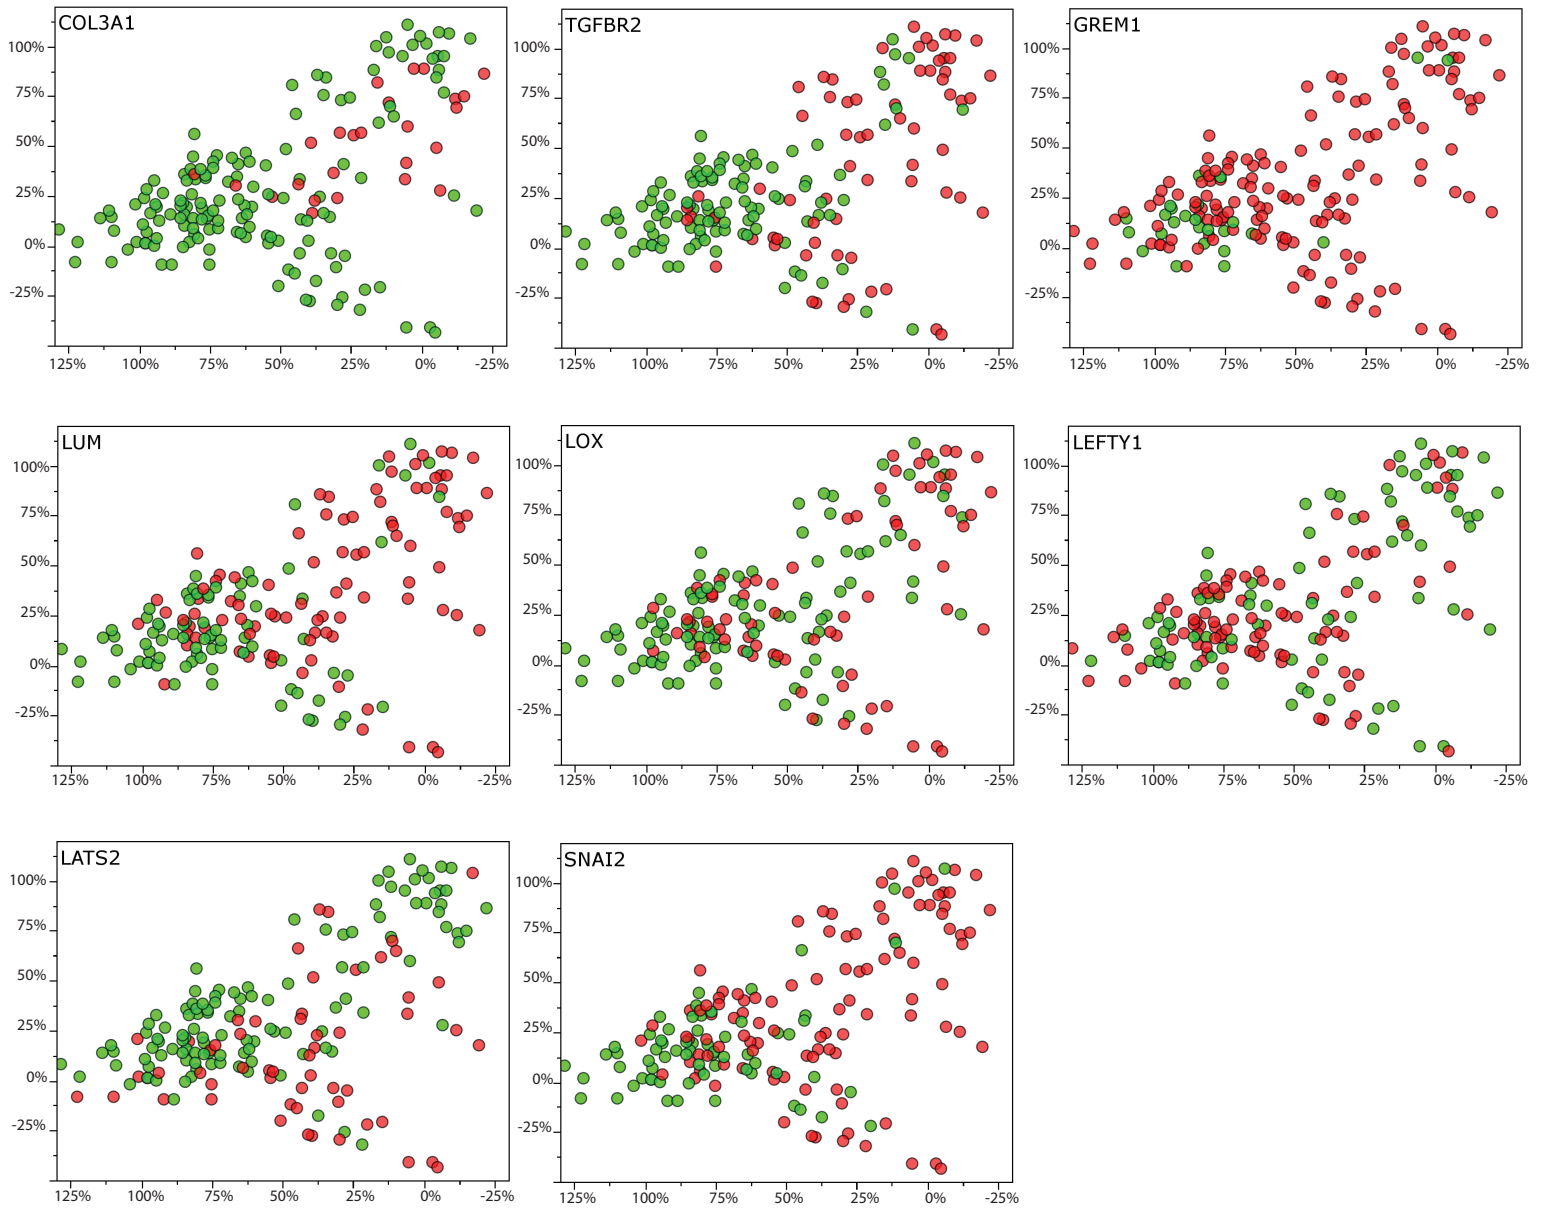

## Chromatin Modifiers

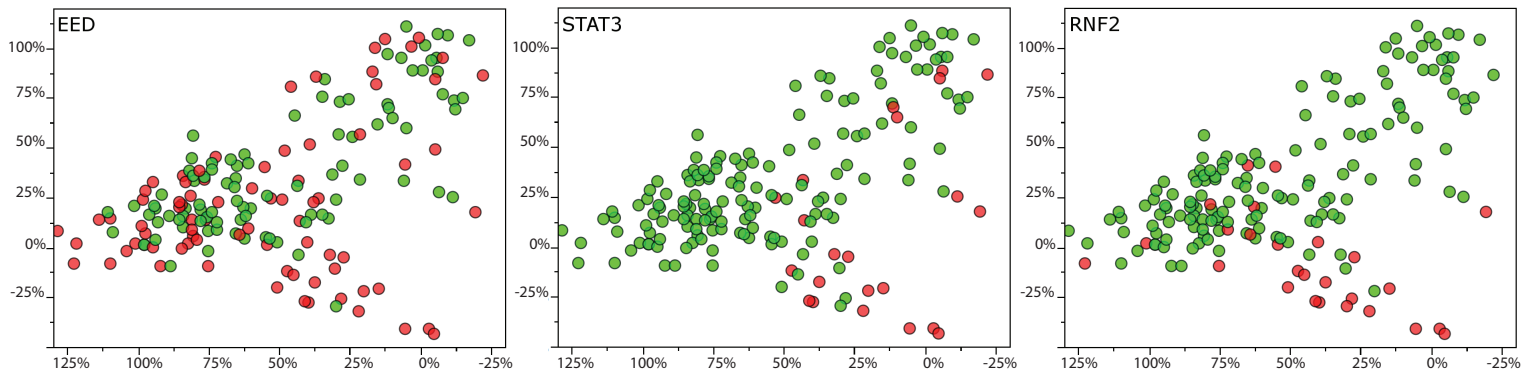

# Chromatin Modifiers

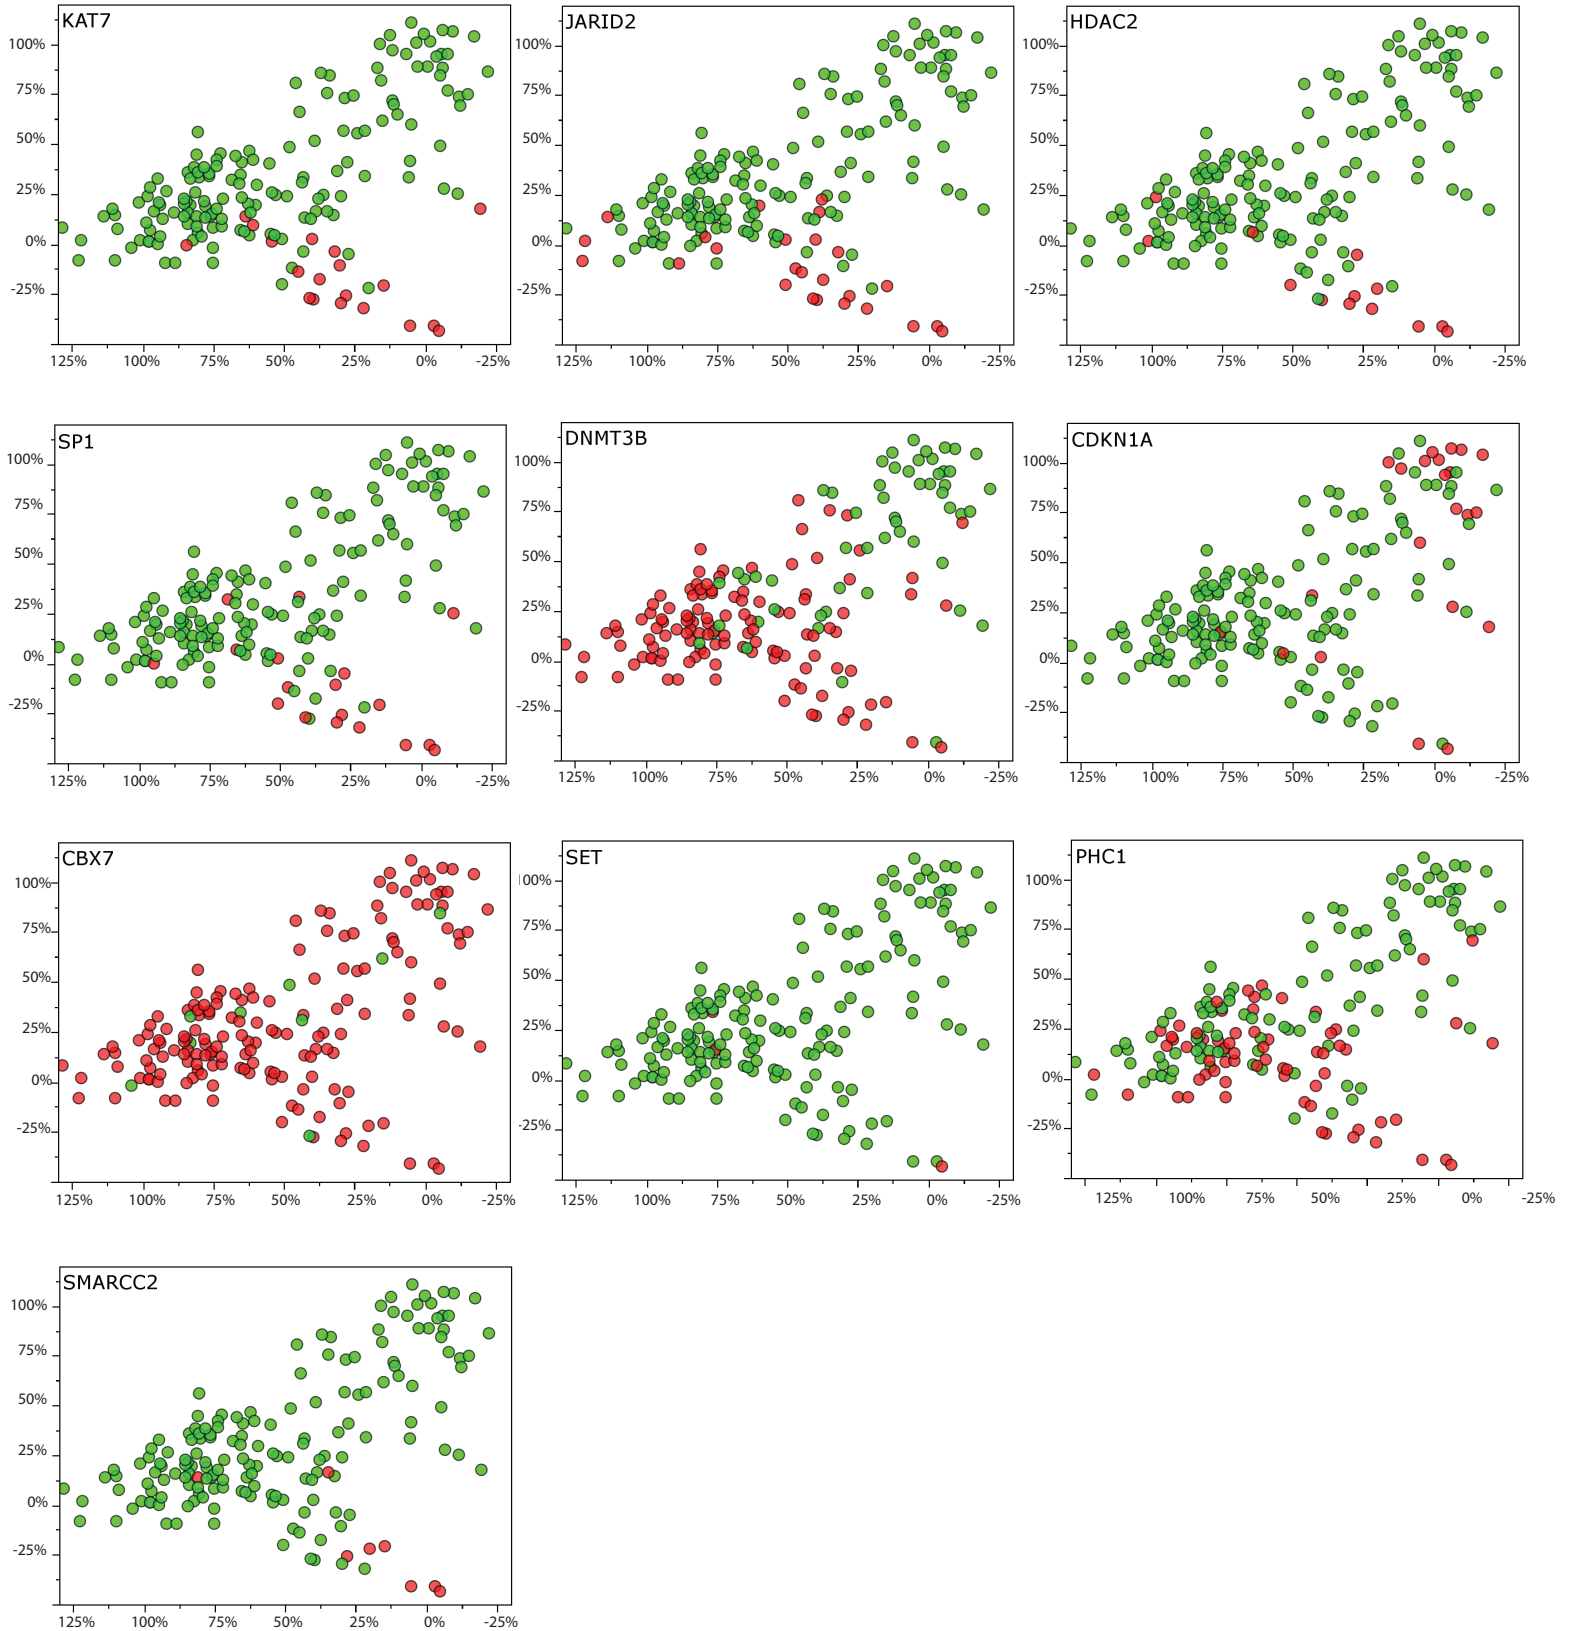

## Intermediate

---

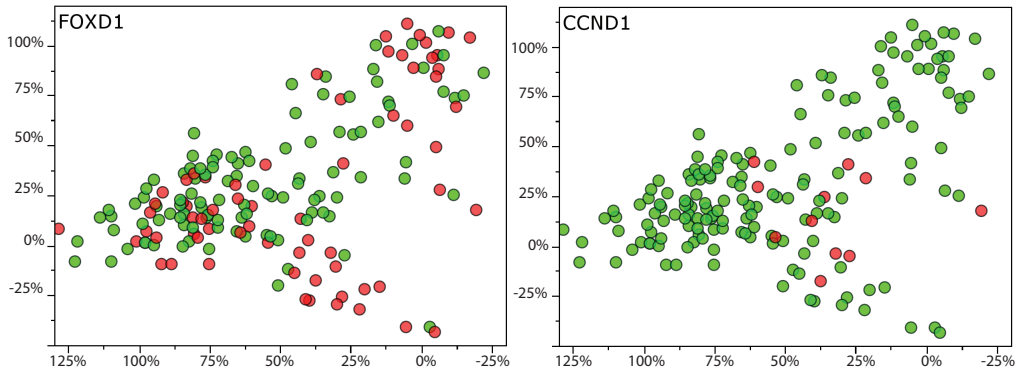

**Figure S3:** Bubble Plots Demonstrating Qualitative Changes in Gene Expression During Reprogramming

Bubble plots were generated using the relative fibroblast and relative H9 similarity metrics to plot the presence (green) or absence (red) of genes expression in a given cell. This view of the transcriptional dynamics during reprogramming reveals genes activated early, intermediately, or late in the process. Genes with no qualitative changes in expression are also observed.
