# Supplementary material for: Single Cell Analysis Reveals the Stochastic Phase of Reprogramming to Pluripotency Is an Ordered Probabilistic Process
Source: PubMed Central journal article supplement (PMC3990627; doi:10.1371/journal.pone.0095304), 2014-04-17
Supplement: pone.0095304.s004.pdf [file pone.0095304.s004.pdf]

Figure S4

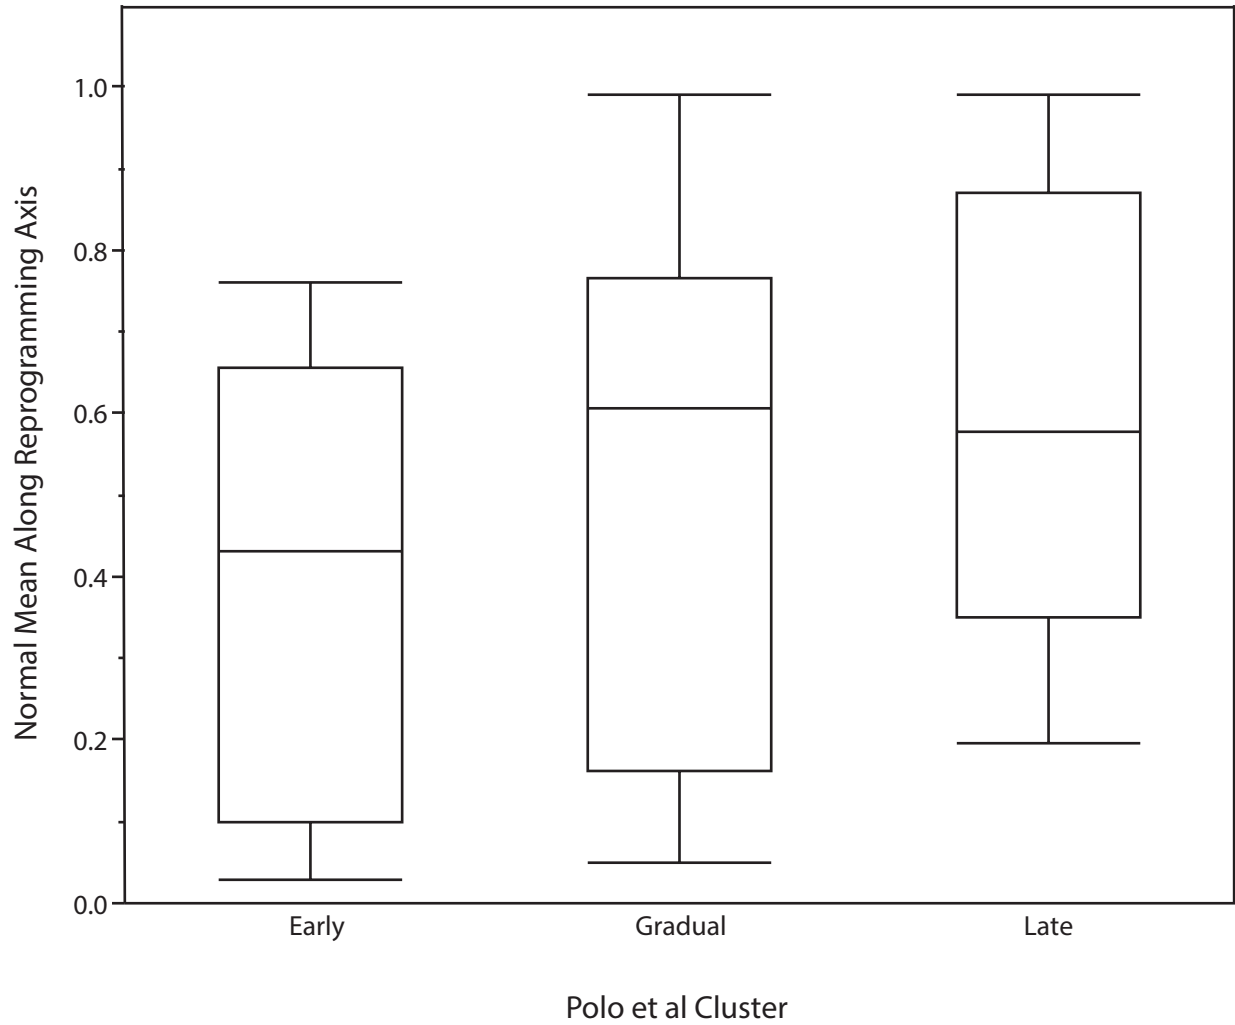

**Figure S4:** Comparison of timing of gene activation / inactivation with Polo et al 2012. Using the cluster definitions provided in Polo et al genes whose expression increased or decreased Early, Gradually or Late were collapsed into a single Early, Gradual or Late cluster. We then compared these clusters to the mean of the normal distribution for each gene as defined in our model as shown in the box and whisker plots above.
