# Supplementary material for: Single Cell Analysis Reveals the Stochastic Phase of Reprogramming to Pluripotency Is an Ordered Probabilistic Process
Source: PubMed Central journal article supplement (PMC3990627; doi:10.1371/journal.pone.0095304), 2014-04-17
Supplement: pone.0095304.s005.pdf [file pone.0095304.s005.pdf]

Figure S5

Pluripotency Genes

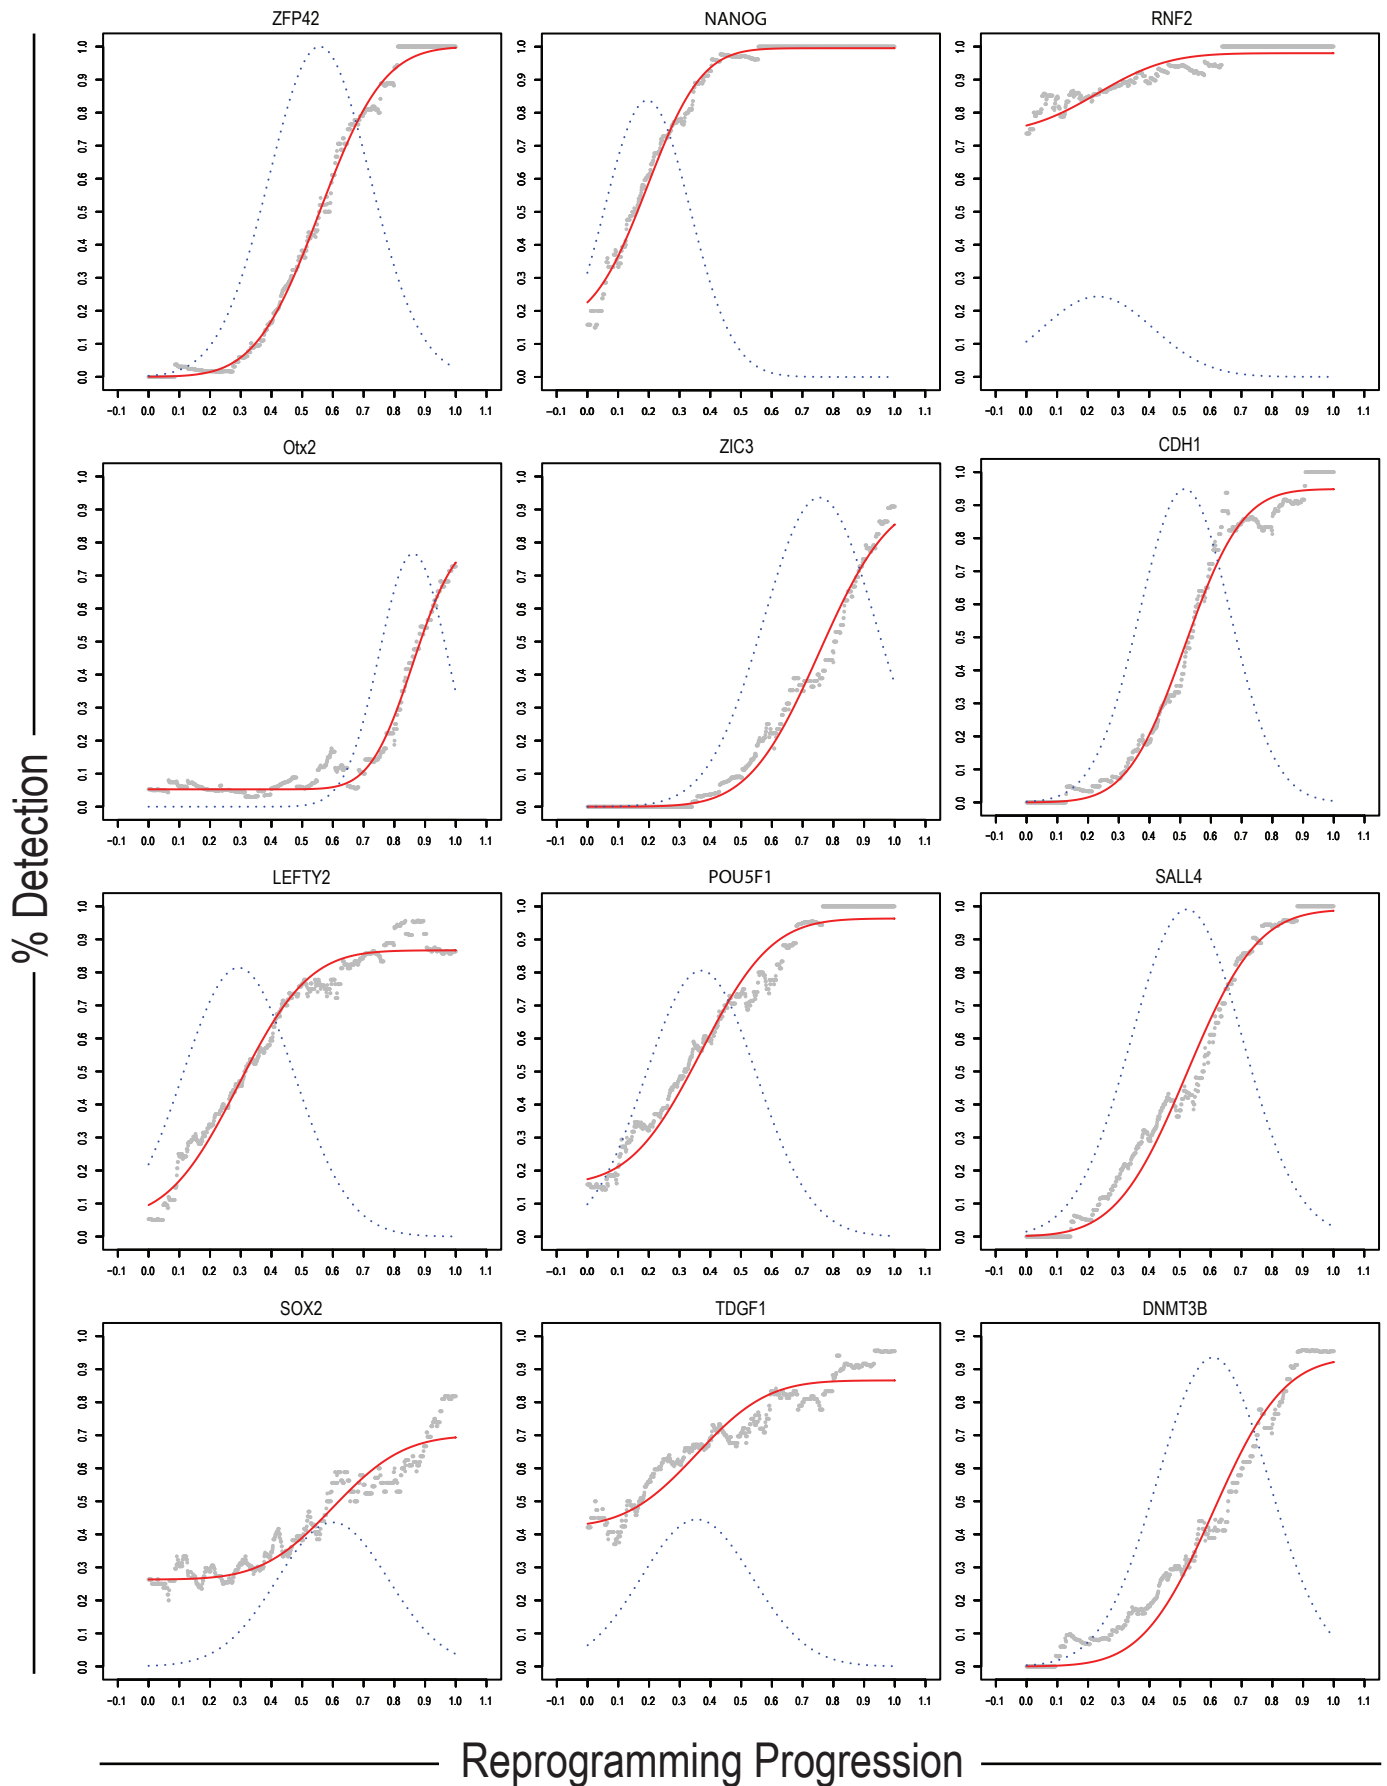

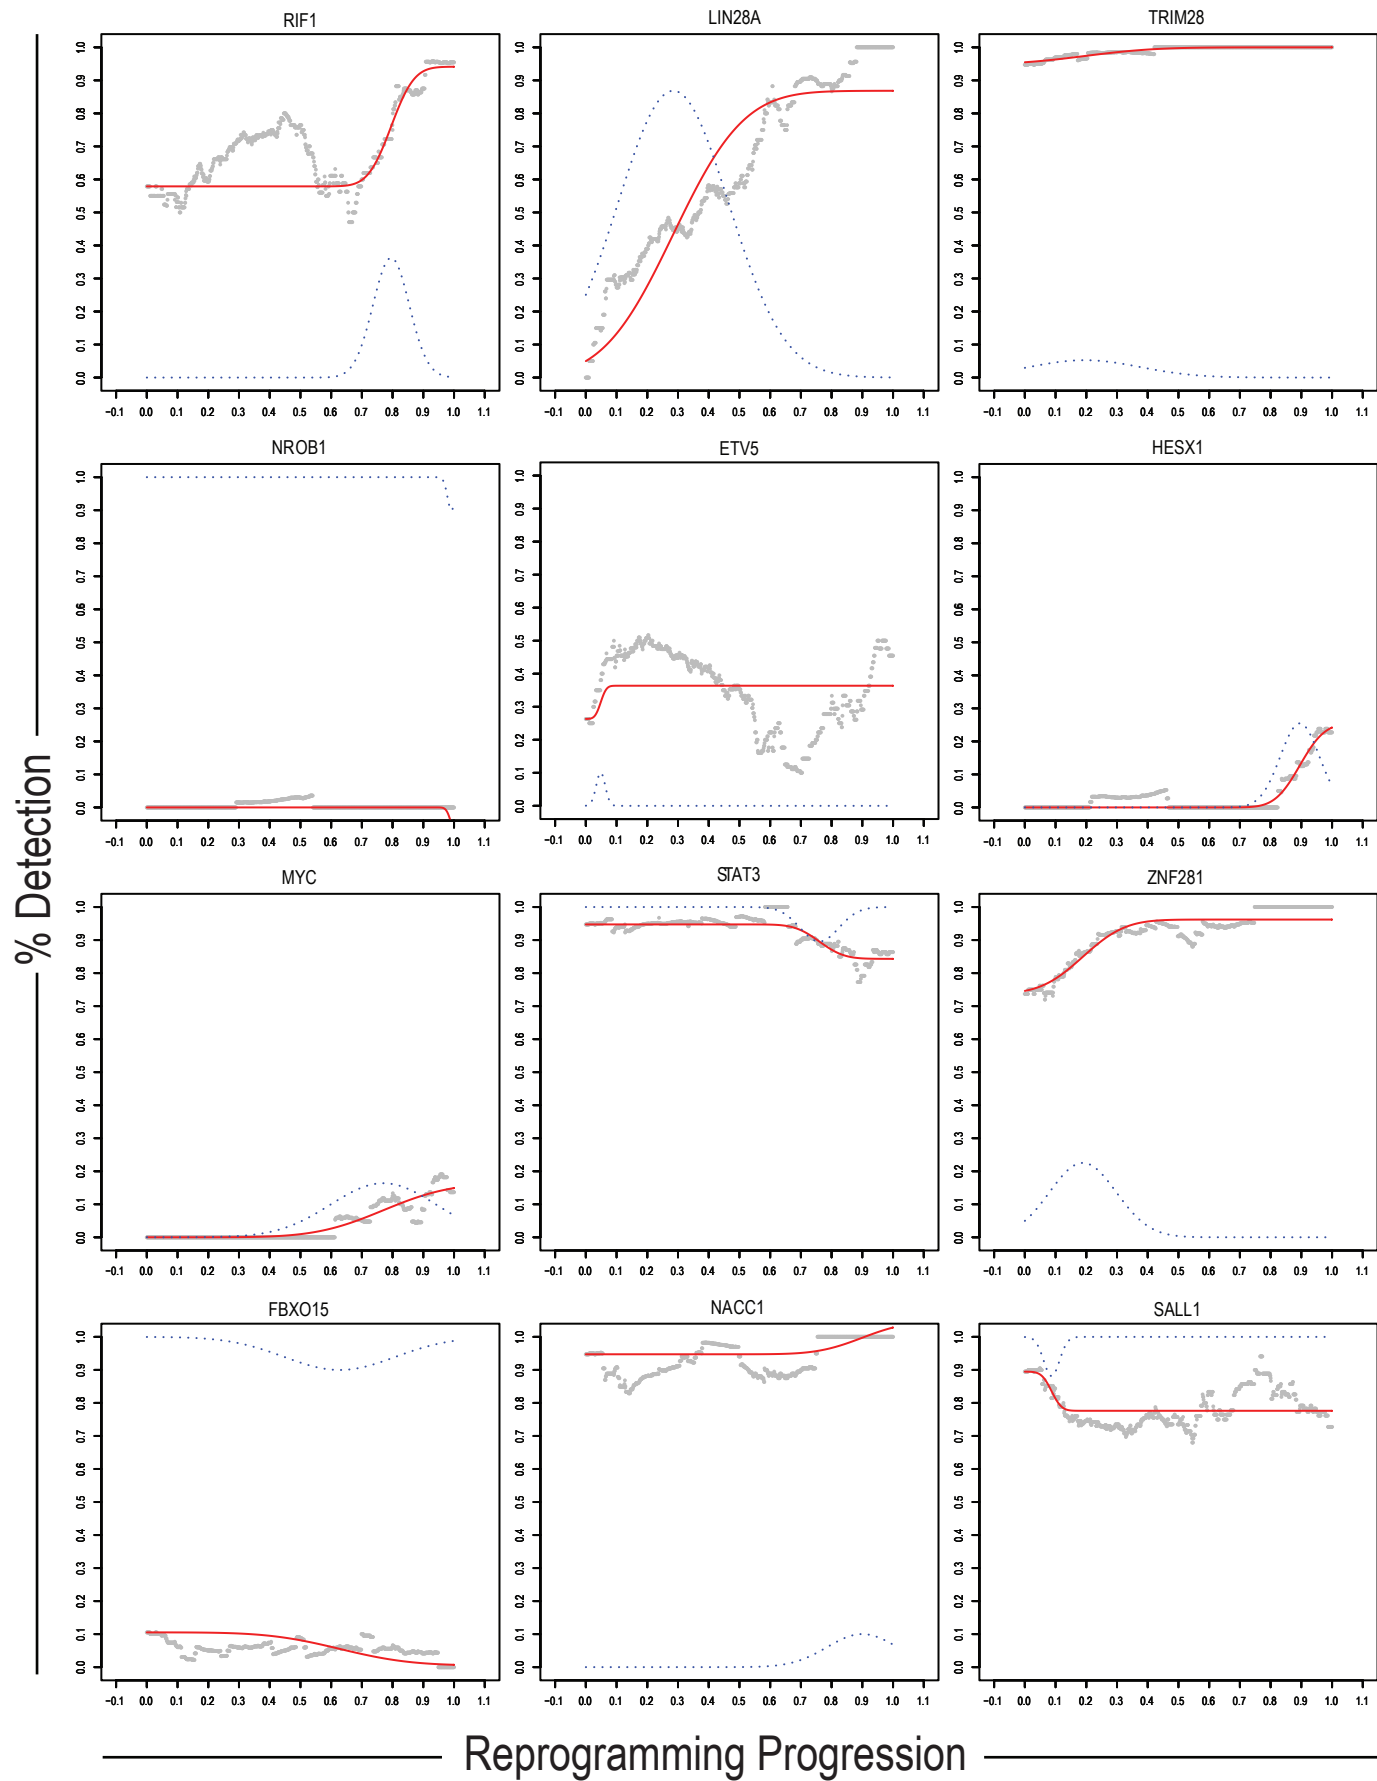

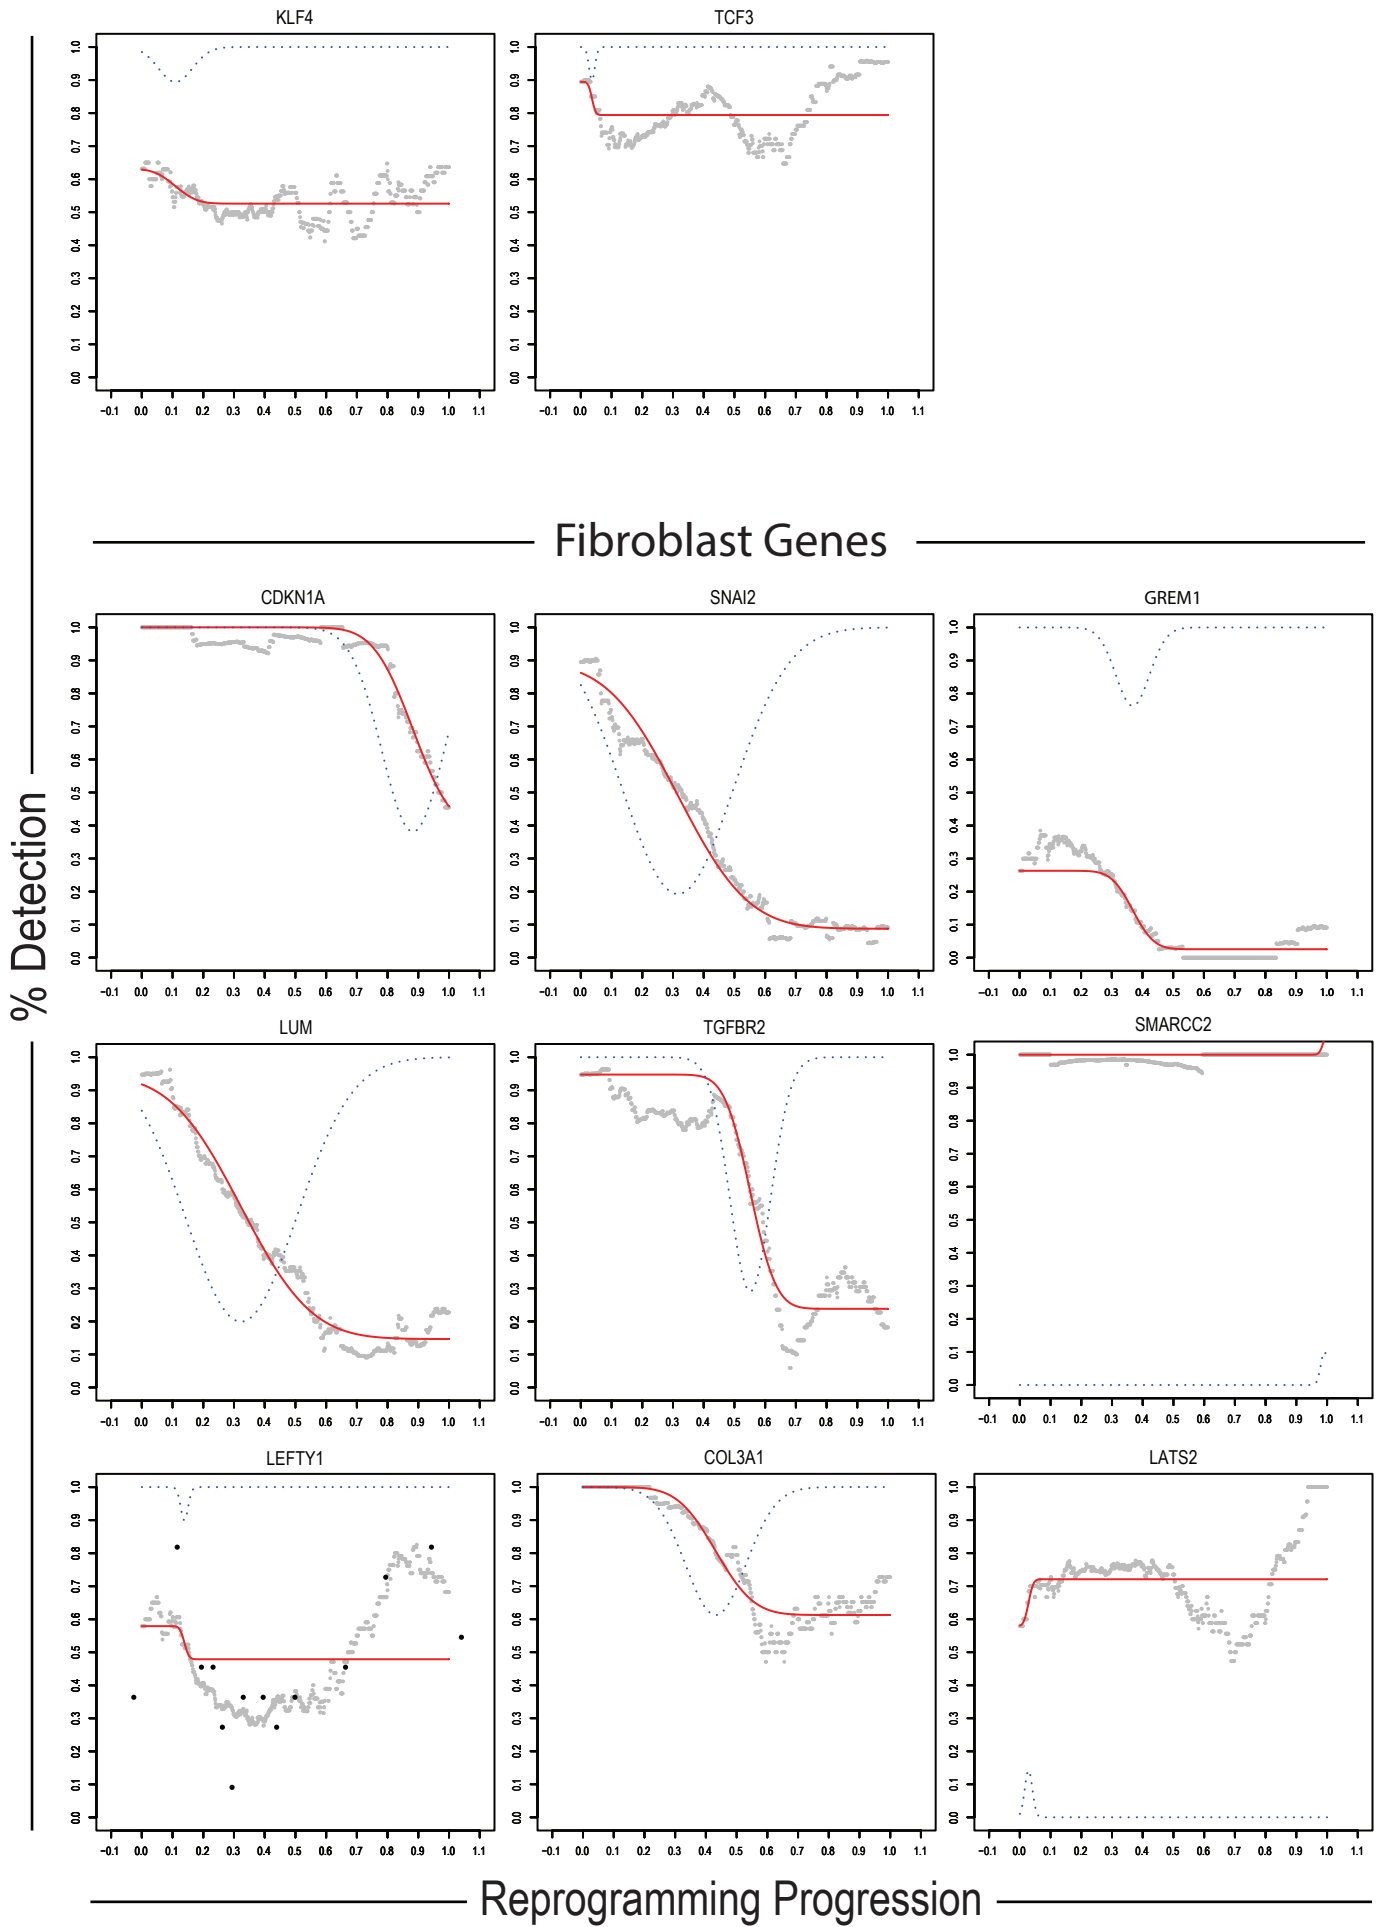

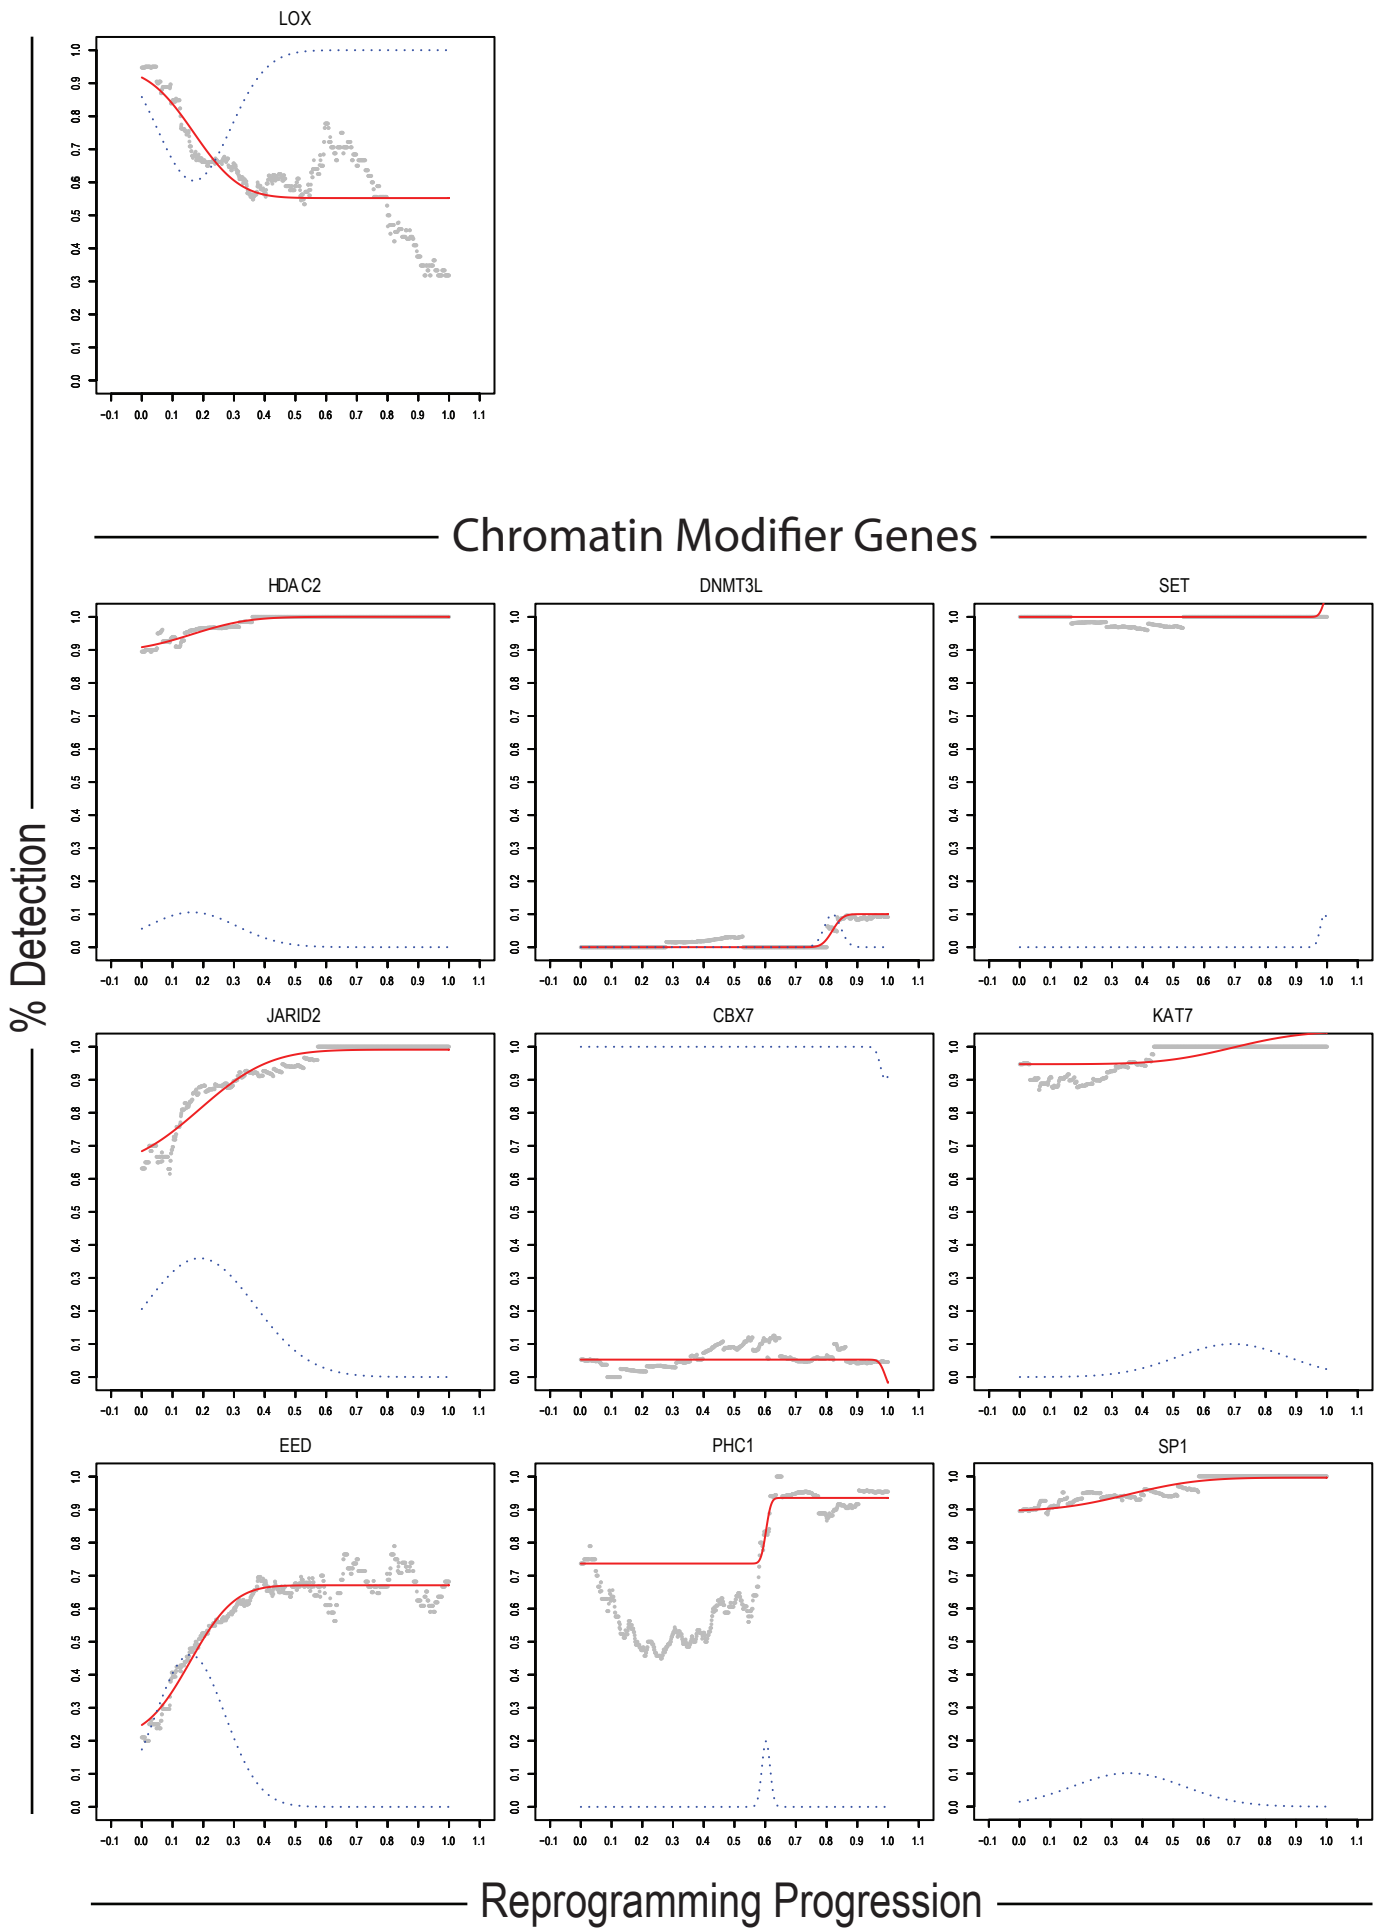

**Figure S5:** Modeling Gene Expression Dynamics Using Gaussian Distributions

Models depict the observed detection frequency (grey dots) along the Reprogramming Progression Axis using a sliding window analysis as described in Methods. Red lines depict the model fit resulting from the underlying normal distribution (blue dotted line).
