# Supplementary material for: Single Cell Analysis Reveals the Stochastic Phase of Reprogramming to Pluripotency Is an Ordered Probabilistic Process
Source: PubMed Central journal article supplement (PMC3990627; doi:10.1371/journal.pone.0095304), 2014-04-17
Supplement: pone.0095304.s007.pdf [file pone.0095304.s007.pdf]

Table S1

| Gene Name    | Taqman Assay ID |
|--------------|-----------------|
| CBX7         | Hs00545603_m1   |
| CCND1        | Hs00765553_m1   |
| CDH1         | Hs01023894_m1   |
| CDKN1A       | Hs00355782_m1   |
| COL3A1       | Hs00943809_m1   |
| DNMT3B       | Hs00171876_m1   |
| DNMT3L       | Hs01081364_m1   |
| EED          | Hs00537777_m1   |
| ETV5         | Hs00231790_m1   |
| FBXO15       | Hs00380856_m1   |
| FOXD1        | Hs00270117_s1   |
| GAPDH        | Hs99999905_m1   |
| GREM1        | Hs01879841_s1   |
| HDAC2        | Hs00231032_m1   |
| HESX1        | Hs00172696_m1   |
| JARID2       | Hs01004460_m1   |
| KAT7 (MYST2) | Hs01561260_m1   |
| KLF4         | Custom          |
| LATS2        | Hs00324396_m1   |
| LEFTY1       | Hs00764128_s1   |
| LEFTY2       | Hs00745761_s1   |
| LIN28A       | Hs00702808_s1   |
| LOX          | Hs00942480_m1   |
| LUM          | Hs00158940_m1   |
| MYC          | Hs01570247_m1   |
| NACC1        | Hs00369413_m1   |
| NANOG        | Hs02387400_g1   |
| NR0B1(DAX1)  | Hs03043658_m1   |
| OTX2         | Hs00222238_m1   |
| PHC1         | Hs01051497_m1   |
| POU5F1       | Custom          |
| REST         | Hs00958503_m1   |
| RIF1         | Hs00871714_m1   |
| RNF2         | Hs00200541_m1   |
| SALL1        | Hs00231307_m1   |
| SALL4        | Hs00360675_m1   |
| SET          | Hs00853870_g1   |
| SMARCC2      | Hs00161961_m1   |
| SNAI2        | Hs00950344_m1   |
| SOX2         | Hs01053049_s1   |
| SP1          | Hs00916521_m1   |
| STAT3        | Hs01047580_m1   |
| TCF3         | Hs01012685_m1   |
| TDGF1        | Hs02339499_g1   |
| TGFBR2       | Hs00234253_m1   |
| TRIM28       | Hs00232212_m1   |
| ZFP42 (REX1) | Hs00399279_m1   |
| ZIC3         | Hs00185665_m1   |
| ZNF281       | Hs00273550_s1   |

**Table S1:** List of 48 Taqman Assays Used for Single-Cell qRT-PCR
