# Supplementary material for: Single Cell Analysis Reveals the Stochastic Phase of Reprogramming to Pluripotency Is an Ordered Probabilistic Process
Source: PubMed Central journal article supplement (PMC3990627; doi:10.1371/journal.pone.0095304), 2014-04-17
Supplement: pone.0095304.s009.pdf [file pone.0095304.s009.pdf]

Table S3

|                       | FIBROBLAST | GFP+<br>DAY<br>4 | GFP+<br>DAY<br>8 | GFP+<br>DAY<br>14 | SSEA4+<br>DAY 4 | SSEA4+<br>DAY 8 | SSEA4+<br>DAY 14 | TRA-1-60+ | CDH1+ | HESC |
|-----------------------|------------|------------------|------------------|-------------------|-----------------|-----------------|------------------|-----------|-------|------|
| # USED IN<br>ANALYSIS | 15         | 14               | 15               | 15                | 16              | 16              | 13               | 48        | 16    | 15   |

**Table S3:** Phenotype and number of cells collected by FACS and used for analysis
