# Supplementary material for: Single Cell Analysis Reveals the Stochastic Phase of Reprogramming to Pluripotency Is an Ordered Probabilistic Process
Source: PLoS One. 2014 Apr 17;9(4):e95304. doi: 10.1371/journal.pone.0095304 (PMC3990627; doi:10.1371/journal.pone.0095304)
Supplement: Table S4 — (XLSX) [file pone.0095304.s010.xlsx]

## Sheet: cell_data
Table S4: Single Cell Gene Expression Data
Sample	CBX7	CCND1	CDH1	CDKN1A	COL3A1	DNMT3B	DNMT3L	EED	ETV5	FBXO15	FOXD1	GREM1	HDAC2	HESX1	JARID2	KAT7	Klf4	LATS2	LEFTY1	LEFTY2	LIN28A	LOX	LUM	MYC	NACC1	NANOG	NROB1	Otx2	PHC1	POU5F1	REST	RIF1	RNF2	SALL1	SALL4	SET	SMARCC2	SNAI2	SOX2	SP1	STAT3	TCF3	TDGF1	TGFBR2	TRIM28	ZFP42	ZIC3	ZNF281
D0 Fib 1	0	34.7193	0	38.1733	43.5591	0	0	0	0	0	35.2683	0	0	0	0	35.1073	0	0	55.349	0	0	39.2963	33.7243	0	34.6343	0	0	0	35.3873	0	0	0	0	30.1233	0	29.9133	32.7903	0	34.5803	0	36.2793	33.7933	32.8353	29.8243	34.8813	0	0	0
D0 Fib 12	0	0	0	36.6054	39.4214	0	0	0	0	0	0	0	30.8034	0	0	0	34.5494	34.7624	29.1484	0	0	38.9664	37.8414	0	0	0	0	31.8444	33.0274	35.6684	0	31.8794	0	32.4814	0	32.5814	36.3394	34.5034	35.0104	31.8374	0	0	0	34.6714	31.8284	0	0	0
D0 Fib 13	0	38.7239	0	39.5819	39.2129	0	0	0	27.0039	26.8229	34.0209	0	29.5069	0	0	26.6899	0	0	0	0	0	36.1879	35.5889	0	32.7929	0	0	0	31.8699	35.4859	0	30.6139	30.6749	33.6609	0	31.2559	36.4139	32.5189	0	34.9029	34.5829	32.0069	24.1389	35.7789	32.1659	0	0	32.2869
D0 Fib 14	0	37.4328	0	39.8618	36.0188	0	0	0	0	0	34.4888	0	30.8088	0	32.2588	32.2198	35.6138	0	0	0	0	37.5748	36.6918	0	30.6948	0	0	0	0	0	0	0	33.1508	33.0468	0	32.0238	36.1298	32.4928	0	25.6528	34.2858	27.0448	24.3608	35.6068	31.1188	0	0	31.7778
D0 Fib 15	29.784	39.796	0	41.588	39.703	0	0	0	0	0	37.218	31.949	31.992	0	33.163	34.247	33.671	35.345	0	0	0	36.13	34.495	0	32.677	0	0	0	35.062	0	0	33.674	34.601	32.842	0	32.581	37.317	35.173	0	35.386	35.556	32.313	28.07	37.135	33.299	0	0	34.087
D0 Fib 2	0	33.7416	0	31.7796	41.1942	0	0	0	0	0	0	0	0	0	30.9176	32.0066	0	0	33.2568	0	0	34.7286	32.6986	0	31.0856	0	0	0	30.1146	0	0	29.3586	0	26.0516	0	29.9186	32.0946	30.7936	0	31.8046	34.1976	30.9696	31.6126	31.6526	32.7786	0	0	28.3316
D0 Fib 4	0	37.8846	0	36.5576	43.5548	0	0	0	0	0	0	0	29.5696	0	35.4826	34.4306	0	32.8356	37.5437	31.7696	33.5636	39.8496	33.3726	0	0	34.6886	0	0	0	36.7926	0	33.1986	33.8286	0	0	33.2706	36.4196	0	0	33.8786	0	0	35.3166	35.0286	36.1236	0	0	34.0296
D0 Fib 6	0	34.5895	0	37.9675	42.931	0	0	0	0	0	0	34.3144	28.6835	0	33.8415	34.7615	37.6625	0	0	0	0	39.6975	0	0	30.7025	0	0	0	0	0	0	32.5485	32.9035	0	0	31.9715	34.6545	33.8205	0	28.9735	32.5645	32.7525	0	32.3665	32.7105	0	0	31.5735
D0 Fib 8	0	36.5102	0	37.4982	40.5487	0	0	0	0	0	36.5352	0	32.2332	0	0	35.2252	36.5922	0	0	0	0	35.0172	34.1882	0	33.5822	30.7142	0	0	37.7562	0	0	34.0242	0	34.6182	0	30.8242	35.8892	36.9902	0	35.3252	36.7012	30.9012	0	35.6782	33.9962	0	0	33.8592
D0 Fib 9	0	38.1144	0	39.3594	42.0644	0	0	0	0	0	0	0	30.6264	0	34.7024	33.0244	0	38.8814	0	0	0	38.8064	37.7494	0	34.1184	29.5054	0	0	34.6184	0	0	34.5864	35.4744	33.8314	0	30.7324	37.8374	33.8564	0	33.2264	35.7744	31.1304	0	36.4894	32.1904	0	0	33.3534
D14 CDH1 1	0	0	34.692	35.151	36.848	30.712	0	29.688	0	0	32.972	0	26.233	0	32.021	31.653	0	33.032	0	0	22.277	0	0	0	30.899	26.799	0	0	23.466	0	0	0	34.73	0	0	34.073	34.274	0	30.293	32.727	34.481	0	0	0	33.014	28.197	0	30.373
D14 CDH1 10	0	34.827	35.026	33.344	0	32.391	29.463	28.933	0	0	34.915	0	29.049	0	0	30.799	0	0	0	0	0	34.911	0	0	32.733	24.997	0	0	31.427	33.418	0	0	32.316	0	0	34.59	34.57	0	23.517	32.661	31.227	30.249	0	27.971	33.738	0	0	31.928
D14 CDH1 11	0	38.387	0	37.475	38.16	0	0	30.594	31.872	0	36.645	0	31.041	0	32.873	32.513	0	34.899	25.767	0	0	33.586	30.318	0	33.173	0	0	0	32.925	0	0	0	32.989	31.317	0	35.289	36.908	34.311	0	34.646	36.393	33.66	0	33.475	32.857	0	0	31.502
D14 CDH1 12	0	35.38	0	37.599	36.288	0	0	26.674	0	0	33.42	0	29.281	0	33.88	31.139	0	31.614	0	0	21.472	34.208	0	0	29.181	29.651	0	0	0	31.198	0	0	31.746	0	0	32.202	33.517	31.974	31.057	31.653	33.106	29.85	0	28.005	30.901	0	0	30.349
D14 CDH1 13	28.103	38.741	31.236	34.974	37.373	0	0	27.702	0	0	0	0	30.974	0	32.485	31.721	0	0	0	0	0	29.052	0	0	31.946	28.813	0	0	0	26.913	0	0	33.512	30.184	0	33.233	32.967	29.038	0	30.721	32.824	31.095	28.29	29.583	32.867	0	0	31.733
D14 CDH1 14	0	0	36.66	33.587	38.241	0	0	28.432	0	27.79	0	0	29.408	0	34.649	33.907	0	32.994	29.475	25.222	28.541	35.921	0	0	31.461	33.911	0	0	33.846	38.799	0	0	32.784	30.29	0	33.878	35.364	0	0	34.207	33.735	0	27.004	0	34.157	30.318	0	34.174
D14 CDH1 15	0	38.377	0	36.349	36.445	0	0	23.477	0	0	31.854	0	28.28	0	32.229	31.567	28.76	0	21.27	27.765	0	30.124	0	0	28.808	27.083	0	0	29.457	0	0	24.706	30.947	29.547	0	32.725	33.618	0	0	30.787	31.07	30.841	0	32.23	31.617	0	0	31.542
D14 CDH1 16	0	37.696	0	36.892	38.03	0	0	0	0	0	32.988	0	28.718	0	33.709	31.325	0	33.635	0	0	27.857	33.299	0	0	27.359	0	0	0	29.588	31.933	0	0	32.616	0	0	32.535	34.147	33.956	22.345	31.762	33.311	30.13	26.718	0	31.579	0	0	31.252
D14 CDH1 2	0	38.471	36.401	34.331	36.809	0	0	26.645	0	0	34.265	0	27.91	0	33.22	30.107	0	33.699	0	27.087	0	0	0	0	27.338	32.374	0	0	0	32.567	0	0	32.556	0	0	32.485	32.727	0	0	30.65	30.804	0	0	0	32.587	0	0	0
D14 CDH1 3	0	35.327	33.67	38.123	38.023	0	0	29.35	0	0	36.841	0	28.234	0	31.775	30.489	30.618	34.278	0	26.581	28.028	0	0	0	29.751	34.601	0	0	0	36.1	0	0	33.638	0	0	30.723	0	0	0	29.828	32.709	0	0	30.7	30.983	0	0	31.649
D14 CDH1 4	0	0	36.181	34.147	36.852	0	0	27.213	0	0	33.507	0	26.762	0	33.079	32.188	0	0	0	25.645	0	0	0	0	31.606	0	0	0	0	0	0	0	31.816	0	24.161	32.412	32.293	0	0	32.368	34.005	27.489	25.787	0	33.788	0	0	31.215
D14 CDH1 5	0	36.114	0	35.487	36.46	0	0	26.617	0	0	29.981	0	27.103	0	29.713	29.118	0	30.396	0	0	0	0	0	0	27.729	0	0	0	30.169	0	0	0	30.765	22.84	0	31.487	29.617	28.487	0	29.412	32.071	27.691	27.516	0	30.678	0	0	27.865
D14 CDH1 6	0	37.963	0	38.101	39.917	0	0	27.87	0	0	34.662	0	28.19	0	34.217	31.901	0	32.429	0	0	0	0	0	0	31.784	0	0	0	32.094	0	0	0	31.87	0	27.021	32.193	32.545	33.418	0	31.607	31.44	0	0	0	32.451	0	0	31.242
D14 CDH1 7	0	0	37.411	36.425	30.577	32.092	0	0	0	0	36.226	0	27.517	0	33.451	32.376	0	33.67	0	0	0	31.864	0	0	0	32.741	0	0	0	33.788	0	27.41	34.29	26.541	0	33.107	34.975	0	0	31.668	33.921	0	0	0	33.506	31.665	0	32.639
D14 CDH1 8	0	34.977	0	37.658	39.609	0	0	30.067	0	0	30.352	0	28.099	0	32.537	32.115	0	0	0	28.767	0	0	0	0	28.615	33.354	0	0	0	0	0	0	35.114	29.733	0	32.953	33.569	0	0	32.591	35.381	31.118	0	0	32.941	0	0	0
D14 CDH1 9	0	38.888	34.931	37.984	0	0	0	0	0	0	35.001	0	31.977	0	34.932	33.24	0	33.547	0	0	29.695	31.122	0	0	32.759	35.968	0	0	33.016	31.008	0	0	35.08	32.316	33.072	35.496	34.752	30.7	0	31.771	0	29.761	0	33.615	33.006	0	0	32.952
D14 GFP 1	25.9229	35.6119	0	35.8949	38.5695	0	0	28.1449	30.8739	0	32.3819	0	31.7449	0	29.6919	32.5849	30.2729	32.3319	32.3536	28.2999	29.7159	0	33.5439	0	32.1529	34.0469	0	0	0	31.5069	0	32.3759	32.2689	31.3949	0	33.8289	32.8289	0	0	32.7529	34.9439	28.5189	32.7499	30.8889	33.4449	0	0	31.7479
D14 GFP 10	0	41.112	0	41.161	42.523	36.373	0	33.768	0	0	0	0	35.154	0	0	37.951	0	39.244	0	0	33.638	36.186	0	0	36.875	35.315	0	0	0	0	0	35.582	35.171	38.674	0	37.61	38.427	0	0	36.529	39.208	32.051	35.762	40.291	38.1	0	0	36.331
D14 GFP 11	0	38.7631	0	35.8941	43.4441	0	0	29.7231	30.7831	0	0	33.0641	31.4301	0	34.1991	32.7261	31.9271	30.5321	31.4021	0	0	37.5061	37.3171	0	33.4971	30.9251	0	31.8741	0	28.3221	0	34.0281	32.9941	22.2721	0	34.0341	35.2131	31.2141	0	32.1161	34.6381	32.2701	0	36.6221	32.7631	0	0	0
D14 GFP 12	0	39.5333	0	39.2373	40.3413	0	0	25.8233	28.8293	26.8573	33.9463	0	31.0253	0	33.4383	32.5823	28.0483	33.2213	26.3843	28.3483	31.9853	36.4133	0	0	31.6843	32.6143	0	0	31.0623	33.7143	0	30.7813	32.7133	31.0913	0	32.9843	35.0943	36.4533	0	28.3143	34.0623	29.4333	31.5063	33.8053	32.1983	0	0	31.9743
D14 GFP 15	0	37.4695	0	37.8525	35.2885	0	0	0	30.1415	0	0	0	30.1195	0	33.1825	32.5135	0	30.1805	26.2595	0	0	33.5665	0	0	30.5105	0	0	0	30.7845	28.7985	0	31.8525	31.9575	0	0	32.6875	0	0	0	31.5745	33.8695	29.7375	0	33.7995	32.8445	0	0	31.8185
D14 GFP 2	31.7471	37.0391	0	35.2611	40.3092	0	0	0	33.5361	0	35.4321	0	32.9971	0	36.0151	32.4701	31.8921	34.8481	28.2867	31.5541	33.0001	0	31.7061	0	34.9331	34.1101	0	32.4871	33.2561	34.3721	0	33.0621	34.1491	33.9401	0	34.8101	34.8511	0	32.8781	35.2341	36.2031	32.5161	32.9571	33.9101	35.4991	0	0	34.3831
D14 GFP 3	0	38.3455	0	38.2405	36.9591	0	0	29.9775	31.7175	0	33.7715	0	31.7365	0	26.8615	0	0	33.0775	0	0	0	0	37.7295	0	32.4285	24.8335	0	0	31.5435	32.4635	0	0	34.8655	32.8355	0	33.5985	36.3135	30.9665	32.3835	31.8515	34.7165	0	24.6555	35.3875	32.2615	0	0	30.8835
D14 GFP 5	0	37.9481	0	38.4311	35.2913	0	0	0	31.3931	0	33.9481	31.9433	32.6381	0	33.9221	33.5021	0	25.5461	0	0	29.8811	31.4581	37.4741	0	34.0661	31.1601	0	0	32.4581	33.2601	0	32.5631	33.5181	29.3171	0	35.2981	37.3621	0	33.6431	34.2841	26.9221	32.6861	31.0111	36.6401	33.4451	0	0	32.9811
D14 GFP 6	0	38.5152	0	32.6082	42.04	0	0	25.2422	0	0	34.9272	0	32.0262	0	31.9512	34.4952	31.5152	35.1432	0	29.3512	31.1172	30.9342	0	0	33.2622	32.7892	0	0	32.5212	33.8712	0	32.7872	32.3412	0	0	34.3562	24.7092	0	0	0	33.0062	31.4522	31.2112	37.0312	34.1762	0	0	32.0582
D14 GFP 7	0	37.761	0	36.763	38.0622	31.13	0	26.882	0	0	34.004	0	31.593	0	33.371	33.518	29.506	32.4	24.2213	28.757	29.119	0	20.875	0	32.121	32.853	0	0	0	32.581	0	32.058	0	32.846	0	33.901	34.588	0	0	30.598	33.401	28.355	29.864	34.62	32.773	0	0	31.426
D14 GFP 8	0	36.6058	0	38.5198	40.8315	0	0	27.2608	29.9138	0	32.9478	0	33.5368	27.5178	32.7998	31.3148	33.8738	33.6128	44.6899	27.9388	0	0	30.6298	0	33.5608	35.1578	0	0	31.8338	0	0	33.2998	0	29.4048	0	33.5898	35.0298	0	0	33.4688	34.7468	29.4198	32.2318	31.9738	33.6188	0	0	31.6148
D14 SSEA4 1	0	38.3369	0	38.1619	42.3491	0	0	30.4549	29.3329	0	31.8269	22.8466	31.5179	0	32.8389	33.3459	32.2649	33.0049	0	0	30.1169	0	39.0209	0	33.7529	25.9759	0	0	0	0	0	32.7229	31.4429	29.7419	0	34.3399	35.1289	33.4379	0	33.7439	34.4879	30.0159	31.0329	34.5099	33.9099	0	0	30.7969
D14 SSEA4 10	0	33.9518	0	37.1128	37.8405	34.1668	0	0	0	0	36.2338	0	0	0	0	0	0	0	27.2419	0	0	0	0	0	0	0	0	0	0	0	0	0	0	0	0	32.8208	0	0	0	0	0	0	26.2898	0	0	0	0	0
D14 SSEA4 11	0	33.9788	0	35.1078	41.778	0	0	27.9418	31.4678	0	31.1768	0	29.6118	0	32.2488	29.7068	0	34.1968	0	26.5498	22.7908	34.7438	33.4528	0	31.5328	31.8558	0	0	0	0	0	31.9718	0	0	0	32.6748	32.6658	0	0	31.0648	34.5178	30.9518	27.5488	32.2478	0	0	0	32.0978
D14 SSEA4 12	0	38.9407	0	38.0047	40.9641	0	0	0	0	0	0	0	0	0	0	0	0	0	0	0	23.8307	33.3347	30.7747	0	31.9667	26.1567	0	0	0	0	0	0	0	31.4497	0	30.2827	34.9117	0	0	30.2467	0	0	0	0	0	0	0	0
D14 SSEA4 13	0	34.508	0	37.115	31.386	0	0	0	28.777	0	29.528	0	31.543	0	33.228	30.823	26.939	30.339	31.2012	0	0	34.755	33.248	0	31.558	0	0	0	29.57	0	0	0	34.279	28.401	0	32.567	33.908	31.119	0	0	32.126	30.822	27.183	30.693	0	0	0	30.937
D14 SSEA4 14	0	35.8336	0	40.3116	42.3482	0	0	26.7236	29.6536	27.7176	32.3836	34.5078	31.8076	0	32.1856	32.2026	29.7246	33.1326	0	0	0	0	0	0	32.2576	31.2456	0	0	32.0466	0	0	31.4466	31.2506	28.9986	0	33.3816	34.1826	0	0	0	32.6606	27.8676	0	34.2106	30.9116	0	0	32.3606
D14 SSEA4 15	0	33.2981	0	35.4691	43.1867	0	0	0	32.3751	0	0	0	31.2271	0	33.1471	33.4521	0	35.1671	0	27.7861	0	36.6321	35.0421	0	35.0531	31.8901	0	0	34.1441	0	0	0	33.6111	0	0	34.6071	35.6591	0	0	33.6761	35.1251	0	0	31.2151	32.8281	0	0	32.9491
D14 SSEA4 16	0	35.3563	0	34.9963	42.5021	33.0093	0	0	30.2733	0	0	0	29.8383	0	32.3423	34.5183	30.4663	34.5963	0	27.3673	29.1483	0	0	0	33.0573	28.9183	0	0	0	0	0	31.7063	0	29.5343	0	33.5333	31.3503	0	0	33.2623	34.1293	30.9513	33.6433	34.4153	34.3733	29.8343	0	31.7533
D14 SSEA4 2	0	41.3039	0	0	35.1054	0	0	0	0	0	0	0	0	0	0	0	0	0	35.1873	0	0	0	0	0	32.4129	0	0	0	0	0	0	0	0	0	0	33.5949	0	0	0	0	0	0	26.6399	33.8209	0	0	0	0
D14 SSEA4 3	0	35.1573	0	0	38.2732	0	0	0	0	0	0	0	0	0	0	0	0	0	0	0	0	0	0	0	0	27.2363	0	0	0	0	0	0	0	0	0	0	0	0	0	0	0	0	0	0	0	0	0	31.6263
D14 SSEA4 4	0	33.2175	0	37.4855	34.0677	0	0	0	0	0	0	0	31.0265	0	32.5105	32.4255	21.4905	30.3655	27.7063	26.8635	0	0	25.7225	0	31.8665	28.8895	0	0	0	0	0	29.7365	32.2325	31.0245	28.1085	0	33.7925	0	0	30.9315	34.7135	28.2475	29.7365	28.1315	32.8055	20.8925	0	30.2615
D14 SSEA4 5	0	34.3146	0	35.3776	39.2255	0	0	26.5786	0	0	33.9826	0	31.8666	0	32.9396	31.9696	32.3196	31.9606	33.7485	27.5706	0	31.9516	26.0326	0	33.1756	30.9646	0	0	32.4026	0	0	30.3346	31.0356	31.9526	31.3536	33.5006	35.5506	30.4456	31.4086	30.4446	35.1926	32.1976	30.6816	33.4426	33.5136	32.0916	0	33.2326
D14 SSEA4 6	0	34.7929	0	33.9459	31.2731	0	0	0	0	0	0	0	30.9379	0	0	0	0	0	31.8932	21.5729	23.9349	0	33.0859	0	32.7339	0	0	0	0	0	0	0	0	0	27.7589	30.7479	0	0	0	0	0	0	24.5959	0	24.6849	0	0	0
D14 SSEA4 7	0	36.9295	0	35.8725	36.323	0	0	26.7625	30.1155	0	36.2285	33.8941	29.9425	0	30.9015	31.4105	0	30.7785	30.6572	25.1565	28.0255	0	32.4465	0	32.5385	29.7495	0	0	0	0	0	0	29.5515	31.8165	0	31.8645	32.7645	33.8855	0	31.9635	32.6255	29.4545	28.6185	33.2135	32.2255	0	0	28.9815
D14 SSEA4 8	0	34.4791	0	36.2731	29.6031	0	0	30.8181	24.4001	0	31.5841	28.3667	32.5501	0	34.2591	34.5061	0	30.6161	0	20.4081	27.4671	0	34.9301	0	31.6351	26.2541	0	0	31.1511	29.5591	0	30.5681	33.1401	31.0581	0	33.8701	35.3891	30.7241	32.4331	32.1631	35.4001	30.8901	0	32.2871	32.8841	0	0	32.4391
D14 SSEA4 9	0	34.6084	0	40.6234	32.8609	0	0	29.9804	0	0	0	0	32.3924	0	32.3704	32.9584	0	0	24.1023	0	0	39.1904	37.6784	0	32.1014	0	0	0	30.3254	0	0	32.6214	31.3154	0	0	34.2424	35.2684	0	0	32.3394	34.1944	32.8244	32.4324	33.8894	30.3844	0	0	0
D14 SSEA4 and Tra1-60 1	0	36.8326	0	0	34.3891	0	0	0	0	0	36.0826	0	33.1146	0	36.0886	33.4946	32.1906	0	0	30.0816	34.5566	33.9946	31.9126	0	33.8596	37.3786	0	0	0	36.1306	0	33.6486	34.7376	31.9976	33.5416	35.4306	33.7336	33.7876	33.2946	0	0	33.0386	26.2896	33.9536	36.0536	33.9166	0	32.2846
D14 SSEA4 and Tra1-60 14	28.6341	33.8821	29.8051	37.1531	29.5968	0	0	0	0	0	0	0	30.8021	0	33.0061	32.6631	35.1911	32.0021	25.5381	27.7491	0	34.0081	31.6691	0	32.1461	32.0791	0	0	31.5781	31.3341	0	30.8941	31.4941	0	30.7971	32.9871	33.2951	28.8221	0	30.3021	32.3161	24.0321	0	32.3611	34.3611	0	0	32.1721
D14 SSEA4 and Tra1-60 16	0	39.5899	32.8209	35.7709	40.9752	0	0	30.1199	0	0	34.9599	0	32.1959	0	34.9539	32.4029	0	32.2409	0	32.8809	29.6609	35.2939	33.1819	0	32.7749	36.4209	0	0	0	32.7959	0	32.8639	34.1219	30.4519	0	34.5279	35.7689	31.3549	35.4349	31.1459	34.6319	32.0719	33.1899	34.0109	33.2209	32.5489	0	33.6169
D14 SSEA4 and Tra1-60 23	0	35.0369	36.7069	36.6019	30.4326	34.3389	0	0	31.4329	0	32.6909	0	30.8599	0	36.0909	33.1749	31.8639	30.7059	31.1779	29.0249	32.8459	0	0	22.3689	33.9139	35.1809	0	0	34.5309	38.5949	0	32.2489	31.8909	32.9459	33.8009	34.9999	33.9149	0	34.6819	33.3869	34.1789	29.7609	35.2319	31.6039	34.7329	33.9309	0	34.1839
D14 SSEA4 and Tra1-60 24	30.9082	35.5642	37.7602	36.6402	30.309	31.4042	0	27.8012	32.1352	0	37.2442	0	32.1702	0	36.9712	34.2632	35.5912	0	28.7468	33.7492	28.7372	32.6182	30.1112	25.9012	34.3292	37.9842	0	0	34.9402	39.4522	0	31.2402	31.6102	0	33.6522	34.1942	34.2012	0	36.2182	33.1562	34.0032	29.7802	37.3362	32.7152	34.1382	34.1852	0	33.9172
D14 SSEA4 and Tra1-60 25	0	39.712	38.227	39.139	0	0	0	30.537	0	0	35.543	0	29.638	0	37.527	36.043	0	0	0	28.814	31.526	30.133	0	0	32.779	37.922	0	0	33.735	43.314	0	28.729	35.551	30.772	32.585	35.264	37.001	0	36.957	32.523	34.847	33.517	31.239	0	33.544	0	0	34.552
D14 SSEA4 and Tra1-60 26	0	36.244	0	34.502	0	31.216	0	28.374	0	0	35.633	0	30.824	0	35.373	32.249	36.083	33.653	0	27.08	28.784	32.593	0	0	33.352	39.562	0	0	34.241	36.002	0	0	33.893	29.13	30.411	34.154	34.289	0	0	30.555	34.312	31.157	32.105	0	34.038	32.627	0	33.177
D14 SSEA4 and Tra1-60 27	0	38.694	0	35.41	33.889	0	0	0	0	0	0	0	29.676	0	34.1	0	0	0	0	0	0	29.667	0	0	0	35.35	0	0	0	35.818	0	0	0	26.727	0	32.661	33.8	0	0	30.958	35.794	0	30.709	0	33.194	0	0	31.693
D14 SSEA4 and Tra1-60 28	0	32.529	0	35.485	33.699	0	0	28.069	0	0	33.874	0	27.451	0	32.946	31.366	28.982	32.79	21.98	0	20.376	31.051	0	0	30.26	32.086	0	0	29.482	35.054	0	28.824	31.453	27.184	0	32.094	34.465	0	21.937	31.387	31.286	30.39	28.191	32.319	31.819	31.091	0	31.403
D14 SSEA4 and Tra1-60 29	0	37.997	35.522	35	0	30.831	0	29.706	0	27.843	35.936	0	29.188	0	36.821	32.93	31.172	31.995	28.29	27.578	29.415	0	0	0	32.381	35.2	0	0	34.763	41.614	0	29.644	32.967	29.216	30.873	32.958	33.999	0	0	30.295	33.244	30.23	31.363	0	31.45	31.454	0	31.693
D14 SSEA4 and Tra1-60 30	0	35.998	36.395	35.297	35.484	31.209	0	28.94	0	0	33.318	0	28.625	0	31.618	32.209	0	0	24.803	28.888	29.672	32.206	0	0	31.455	34.23	0	0	32.871	36.42	0	31.152	34.379	26.263	30.167	33.132	34.636	0	31.404	31.209	31.641	31.877	28.867	0	33.466	30.171	0	32.326
D14 SSEA4 and Tra1-60 31	0	37.72	30.888	35.709	34.762	30.667	0	28.312	0	0	33.569	0	28.89	0	33.246	30.672	0	30.789	0	0	22.726	31.944	0	0	30.979	37.347	0	0	0	0	0	29.239	31.084	26.37	32.454	32.654	34.615	0	0	31.393	33.137	30.964	29.689	32.969	32.856	0	0	28.467
D14 SSEA4 and Tra1-60 32	0	25.405	31.525	39.063	42.232	30.915	0	0	0	0	35.249	0	28.484	0	33.21	32.659	0	33.297	0	29.547	0	36.187	36.227	0	0	0	0	0	32.262	0	0	26.363	32.058	0	0	31.938	36.263	33.562	35.413	32.68	34.843	30.892	0	33.901	33.447	0	0	31.762
D14 SSEA4 and Tra1-60 33	0	38.407	0	35.528	32.686	0	0	31.768	0	0	0	0	29.124	0	32.505	34.419	0	0	0	0	0	31.363	0	0	0	34.85	0	0	0	0	0	0	35.066	0	32.894	34.892	33.286	0	0	31.608	34.278	0	0	0	32.988	0	0	0
D14 SSEA4 and Tra1-60 34	0	38.466	33.457	35.928	0	32.15	0	0	0	0	33.818	0	28.472	0	34.964	31.373	0	33.869	0	30.521	30.996	28.224	0	0	31.893	36.33	0	0	33.71	40.746	0	0	34.333	32.873	34.094	34.636	33.516	0	0	31.968	32.87	30.158	0	0	33.168	33.431	0	32.601
D14 SSEA4 and Tra1-60 35	0	39.38	0	37.366	0	0	0	30.864	0	0	0	0	30.003	0	33.623	34.752	0	0	28.809	29.795	0	34.437	0	0	32.469	34.45	0	0	34.162	40.388	0	30.303	33.538	32.258	31.679	34.245	36.124	34.113	0	32.742	33.417	29.622	32.479	33.681	34.579	0	0	33.894
D14 SSEA4 and Tra1-60 36	0	40.577	38.776	36.618	0	0	0	0	0	0	35.212	0	31.724	0	35.056	33.645	0	0	0	32.438	0	33.085	0	0	32.147	36.637	0	0	31.335	41.074	0	29.849	32.991	28.74	31.846	32.624	35.233	0	38.016	32.186	33.714	31.743	31.022	31.679	32.16	29.664	0	32.351
D14 SSEA4 and Tra1-60 37	0	35.111	0	0	0	36.115	0	30.669	0	0	0	0	31.961	0	34.511	34.651	0	30.735	27.927	27.747	33.67	0	0	0	33.902	32.242	0	0	0	33.538	0	0	34.77	31.812	32.557	35.876	36.161	0	0	33.66	34.738	33.378	32.287	0	34.715	33.873	0	32.428
D14 SSEA4 and Tra1-60 38	0	39.925	0	38.116	34.981	0	0	0	0	0	35.298	0	31.092	0	34.601	36.215	0	35.488	0	30.643	0	35.731	0	0	33.354	36.56	0	0	34.708	34.834	0	30.86	31.646	31.143	33.404	34.89	36.386	0	0	33.495	35.396	30.959	26.702	31.899	32.818	32.126	0	34.423
D14 SSEA4 and Tra1-60 39	0	38.68	31.638	37.027	0	32.428	0	26.575	0	0	34.292	0	31.159	0	34.15	31.732	0	34.953	0	28.246	32.525	0	0	0	31.631	37.445	0	32.534	34.446	41.538	0	30.627	30.915	31.687	32.981	34.796	32.108	0	37.053	30.486	33.304	31.306	31.28	0	34.129	34.99	0	32.438
D14 SSEA4 and Tra1-60 4	0	37.2059	36.4059	35.1479	30.8438	0	0	0	31.6419	0	32.4679	0	31.2719	0	34.3369	32.5399	30.2139	30.0729	25.9708	28.6249	31.8459	30.3739	29.0049	0	29.8569	31.0399	0	0	32.5689	38.1649	0	31.1709	33.0209	31.6379	29.5539	33.3389	32.0859	0	27.8579	31.4169	34.2919	31.1489	34.2979	0	32.2899	32.4749	0	31.4209
D14 SSEA4 and Tra1-60 40	0	37.59	0	36.142	33.234	0	0	0	29.504	0	34.276	0	26.794	0	30.791	32.452	0	33.299	0	25.223	28.174	32.908	0	0	30.138	36.524	0	0	32.812	0	0	28.427	31.938	0	32.786	33.283	34.352	31.865	33.347	31.297	31.213	0	0	0	31.101	0	0	0
D14 SSEA4 and Tra1-60 41	0	33.949	37.123	34.311	0	32.402	0	29.871	0	0	33.813	0	30.621	0	31.207	34.739	31.371	31.118	0	24.413	0	22.665	0	0	33.325	34.287	0	0	32.894	0	0	0	32.403	0	0	34.609	28.008	0	0	33.724	32.379	0	30.546	28.817	34.062	34.286	25.107	33.814
D14 SSEA4 and Tra1-60 42	0	38.522	37.25	36.648	0	31.724	0	0	31.614	0	32.591	0	32.399	0	36.346	33.968	0	32.788	29.781	33.942	31.646	23.536	0	0	34.67	36.412	0	26.644	35.786	42.108	0	30.03	34.683	29.271	29.977	35.102	35.104	0	0	34.181	33.093	35.097	31.388	31.218	35.536	34.662	25.46	33.888
D14 SSEA4 and Tra1-60 43	0	38.872	34.187	32.001	34.048	32.734	0	0	0	0	0	0	32.315	0	35.152	35.195	0	0	29.544	27.412	29.978	30.943	0	0	33.458	34.98	0	0	33.36	38.032	0	26.876	34.068	33.478	30.782	34.189	33.588	0	0	33.113	33.274	34.239	31.239	0	34.58	32.968	23.852	32.773
D14 SSEA4 and Tra1-60 44	0	36.551	0	39.831	0	0	0	32.918	0	0	36.079	0	34.408	0	39.275	35.156	0	0	31.52	32.002	0	0	0	0	35.077	37	0	0	35.932	39.954	0	0	36.638	36.152	32.331	36.173	38.117	0	0	36.328	34.745	37.362	0	34.096	34.747	0	27.374	33.453
D14 SSEA4 and Tra1-60 45	0	38.719	34.304	32.851	33.382	0	0	29.937	0	0	36.868	0	31.779	0	36.583	33.875	31.532	32.221	0	24.912	32.759	35.809	0	0	34.625	37.824	0	0	35.331	36.326	0	31.348	34.568	33.769	0	34.646	34.9	0	36.194	34.84	35.345	33.669	35.238	0	35.051	32.425	25.667	34.478
D14 SSEA4 and Tra1-60 46	0	38.511	37.023	32.924	0	35.069	0	30.071	0	0	0	0	31.6	0	35.509	34.343	30.541	30.816	33.269	34.345	31.129	0	0	0	33.9	36.566	0	0	34.771	41.456	0	30.674	34.243	29.984	31.592	36.008	33.849	0	0	34.106	33.698	32.726	31.966	0	35.678	35.037	25.297	32.859
D14 SSEA4 and Tra1-60 47	0	37.021	36.243	0	0	34.937	33.06	29.679	0	0	32.354	0	30.434	0	35.509	32.122	0	32.347	30.075	32.964	31.93	33.274	0	0	31.676	36.101	0	36.221	33.642	40.872	0	30.255	32.981	0	27.893	35.245	34.569	0	0	31.866	33.579	32.664	30.038	0	33.235	35.534	25.81	33.37
D14 SSEA4 and Tra1-60 49	31.839	38.72	0	35.351	0	0	0	31.162	33.157	0	35.631	0	32.395	0	36.829	34.869	0	0	30.101	28.322	0	34.288	0	0	33.815	37.581	0	25.287	36.044	28.783	0	31.813	35.327	34.418	33.54	35.757	36.787	31.509	0	34.854	36.55	33.679	31.887	31.871	33.443	0	26.485	35.715
D14 SSEA4 and Tra1-60 50	0	38.176	36.005	35.54	32.791	0	0	31.177	0	0	0	0	33.599	0	36.405	34.56	31.794	32.589	28.774	0	0	0	0	0	34.585	37.14	0	0	37.174	42.062	0	32.415	34.483	30.8	32.74	36.54	36.273	0	0	35.092	35.413	33.519	34.145	0	34.995	34.474	26.626	34.402
D14 SSEA4 and Tra1-60 51	0	36.355	37.228	0	0	34.345	32.484	27.31	30.383	0	33.323	0	31.676	0	36.013	33.715	30.5	29.047	28.574	32.913	31.96	0	0	0	33.598	35.757	0	0	35.563	39.664	0	30.268	33.267	0	31.817	35.007	33.622	0	0	32.989	33.241	34.08	31.922	0	34.947	34.976	24.629	33.082
D14 SSEA4 and Tra1-60 52	0	39.671	26.725	25.942	35.481	35.624	0	31.482	0	0	35.38	0	33.221	0	37.226	36.395	0	0	0	31.03	33.298	0	0	0	33.887	35.985	0	33.678	34.977	38.919	0	31.649	34.345	34.476	32.92	36.3	36.979	33.062	33.15	34.15	0	34.467	0	33.677	35.316	33.982	25.151	35.747
D14 SSEA4 and Tra1-60 53	0	37.357	37.104	37.375	33.147	37.834	36.436	30.693	0	0	36.739	0	33.077	0	40.384	38.092	0	0	0	35.422	32.588	27.12	0	0	0	38.222	0	0	36.164	43.94	0	0	35.06	0	0	35.984	39.071	0	0	0	0	34.777	0	0	36.696	37.305	27.907	35.298
D14 SSEA4 and Tra1-60 54	0	39.708	38.917	0	34.013	36.296	0	31.13	0	0	0	0	35.266	0	38.442	34.944	33.957	33.333	35.613	39.133	34.137	35.609	0	0	34.118	38.712	0	26.256	36.83	43.706	0	33.238	37.02	33.503	34.128	37.276	36.745	0	0	35.925	35.286	35.249	33.955	0	37.855	38.285	27.651	33.588
D14 SSEA4 and Tra1-60 55	0	40.851	39.773	38.563	0	0	0	0	0	0	39.733	0	34.842	0	36.307	37.677	0	0	0	36.371	33.953	38.351	0	0	0	37.806	0	0	35.285	40.882	0	0	36.694	34.368	35.85	37.648	39.108	0	39.349	34.172	34.445	35.798	37.258	0	33.499	0	28.614	35.748
D14 SSEA4 and Tra1-60 56	0	38.865	39.021	0	0	0	0	33.026	0	0	0	0	31.931	0	36.382	35.096	0	34.291	31.537	31.44	0	0	0	0	34.606	35.924	0	28.449	0	43.011	0	0	36.115	0	0	35.899	36.095	0	0	35.818	35.644	35.692	0	0	35.372	0	27.482	0
D14 SSEA4 and Tra1-60 57	0	40.664	38.798	35.086	0	0	0	30.578	32.515	0	0	0	30.444	0	36.979	33.127	32.509	34.447	32.826	36.269	31.922	0	0	0	31.766	39.443	0	34.986	0	46.858	0	29.701	36.55	0	32.63	35.021	33.994	0	32.981	34.494	33.403	30.612	31.706	35.769	33.242	35.626	25.65	33.92
D14 SSEA4 and Tra1-60 58	0	37.287	34.65	0	25.29	34.554	0	30.756	0	0	33.445	0	29.968	0	36.658	33.791	0	33.423	30.182	28.525	31.168	0	0	0	31.095	36.093	0	0	32.94	42.288	0	0	33.503	31.066	32.334	34.011	34.962	0	27.719	33.271	33.915	0	0	0	33.714	33.502	23.771	32.99
D14 SSEA4 and Tra1-60 59	0	35.45	36.741	37.254	0	34.212	0	0	0	0	34.283	0	29.644	0	0	34.226	32.769	0	30.209	26.16	0	37.704	0	0	33.161	27.845	0	0	0	33.026	0	0	35.12	0	0	35.479	36.674	0	0	33.15	34.276	34.067	31.516	33.008	35.251	32.85	0	34.136
D14 SSEA4 and Tra1-60 6	0	35.5227	37.8577	35.0307	30.4256	33.2987	0	28.1367	0	0	34.6637	0	31.1737	0	34.6347	33.1377	32.9677	32.4147	0	34.3807	0	0	0	0	33.7957	35.6057	0	0	32.5577	39.0087	0	32.8557	32.6907	28.1577	33.0207	34.0177	34.7487	0	0	32.8677	34.5737	31.5377	35.5487	0	34.1097	34.4077	0	33.6867
D14 SSEA4 and Tra1-60 60	0	37.335	35.918	35.355	36.621	0	0	30.768	0	0	35.873	0	32.202	0	35.075	33.55	23.652	0	28.796	0	27.877	37.544	0	0	32.464	36.057	0	26.149	33.966	34.537	0	27.253	34.692	30.915	34.072	34.183	36.862	32.394	34.673	31.48	33.976	30.609	31.034	0	34.442	0	24.053	35.403
D14 SSEA4 and Tra1-60 61	0	37.451	37.871	35.214	0	0	0	30.726	0	0	36.326	0	32.295	0	36.313	33.959	0	0	30.757	28.581	31.508	34.466	0	0	0	37.141	0	0	34.468	41.571	0	28.534	33.82	0	32.728	35.404	36.014	0	0	34.097	33.769	0	30.568	0	34.841	34.138	0	0
D14 SSEA4 and Tra1-60 62	0	38.62	0	33.506	32.53	35.414	0	27.657	0	0	0	0	31.614	0	35.765	34.707	0	0	31.999	33.338	31.112	31.1	0	0	32.75	36.594	0	0	35.248	42.327	0	0	35.415	30.33	33.007	35.282	35.61	0	32.938	32.645	0	0	29.849	0	34.109	32.939	24.125	32.555
D14 SSEA4 and Tra1-60 63	0	37.013	36.417	33.433	0	38.457	0	0	30.484	0	32.877	0	31.446	28.243	37.211	34.187	30.794	30.772	33.745	29.313	31.772	0	0	0	33.282	36.985	0	23.509	35.548	41.236	0	31.39	29.42	0	35.153	34.838	34.117	0	35.894	33.69	0	34.417	33.525	0	34.036	34.588	29.992	34.651
D14 SSEA4 and Tra1-60 64	0	41.452	36.807	36.283	0	38.197	0	0	0	0	0	0	34.063	0	40.641	35.838	36.111	0	0	25.952	33.397	0	0	0	35.885	39.761	0	0	35.78	45.381	0	0	36.865	35.949	37.33	37.796	37.407	0	42.139	36.523	34.33	0	0	0	36.745	0	0	37.256
D14 SSEA4 and Tra1-60 8	0	36.3259	0	36.3049	33.9209	0	0	0	34.0159	0	35.4559	0	32.0329	0	0	32.9789	0	0	29.2258	27.3379	0	34.3649	32.1969	0	34.4299	36.8369	0	0	0	0	0	33.3049	0	0	0	33.9219	35.1939	32.5199	33.4479	0	0	0	0	34.8879	32.0249	32.8839	0	34.4499
D4 GFP 1	0	32.4175	0	34.8235	34.3375	0	0	26.8465	27.4885	0	31.0485	0	31.1805	0	32.0515	30.8685	29.5235	30.1915	0	0	26.9655	0	31.6125	0	31.8151	29.4625	28.1335	0	28.1045	0	0	32.3855	21.2635	30.4575	25.8085	33.2705	32.2245	28.1325	25.6115	30.8725	35.2595	30.2405	21.3195	28.4545	33.1075	0	0	30.8305
D4 GFP 11	0	36.0561	0	37.9571	36.0801	0	0	29.5881	28.5311	0	24.1961	0	31.7681	0	33.9881	31.4971	33.8231	35.1251	0	0	26.5931	0	0	0	33.0531	31.3201	0	0	30.2251	34.6611	0	32.6891	25.9631	34.3961	0	32.7881	35.1241	0	0	32.2471	34.7061	31.1711	28.5881	35.7871	33.1331	0	0	31.7671
D4 GFP 12	0	34.6557	0	36.9697	33.8257	0	0	27.7687	0	0	32.2947	28.3627	30.7197	0	30.4697	32.4457	32.0457	31.9557	0	0	0	26.9137	0	0	31.7637	0	0	29.1257	27.3637	0	0	31.7707	31.5497	30.0457	0	32.1487	32.4897	0	0	32.0807	32.0257	29.1417	0	30.8147	31.6247	0	0	0
D4 GFP 14	0	35.4987	0	0	34.8167	0	0	28.4537	29.0347	0	32.3877	0	32.3607	0	33.6237	32.2547	32.4947	0	0	0	21.3607	33.1597	26.4857	0	23.4267	30.7047	0	0	0	0	0	31.0147	33.5187	29.6767	0	0	34.2717	30.9767	0	31.4567	34.5987	31.1327	28.6697	0	31.9837	0	0	32.4287
D4 GFP 15	0	34.1822	0	35.6462	36.1132	33.9402	0	29.9162	31.6962	0	37.9032	0	29.7742	0	33.9562	31.3592	36.1442	34.5502	0	26.3722	0	36.2652	30.6992	0	32.9892	27.8952	0	0	32.2522	32.8712	0	31.2662	32.9442	34.5742	0	32.8572	32.2192	0	22.6072	30.2742	35.3842	30.6712	0	31.6152	31.6252	0	0	32.8812
D4 GFP 16	0	32.6716	0	38.2566	0	0	0	25.4606	0	0	0	0	30.5156	26.4246	31.3286	32.4916	34.2656	30.5286	0	0	27.6046	32.5996	23.5946	0	31.8496	30.8276	0	0	30.6896	31.9826	0	32.5756	29.1036	31.3996	0	32.4466	33.8596	0	0	31.2146	33.1326	29.5506	30.7926	31.5016	32.2246	0	0	31.2696
D4 GFP 2	0	34.2412	0	36.6232	41.4175	0	0	28.8452	0	0	32.4712	0	32.4492	0	0	33.2552	33.7702	32.4642	30.1153	0	0	0	23.2262	0	33.055	29.5162	0	0	26.5882	0	0	33.4542	32.6452	0	31.3412	33.9672	33.4002	0	0	0	34.9012	0	0	25.4372	23.7392	0	0	0
D4 GFP 3	0	41.1911	0	43.1351	49.1194	0	0	0	34.8941	31.8561	0	0	37.9471	0	37.4711	0	38.9081	35.0651	0	0	27.5931	0	38.5301	0	37.0294	35.6041	0	0	0	36.1441	0	37.3631	37.7121	37.3751	0	38.0141	38.9151	35.2851	0	38.4801	40.5481	36.6231	29.6141	35.5351	37.7121	0	0	34.7671
D4 GFP 5	0	0	0	0	44.5634	0	0	30.3916	0	0	32.6866	0	32.8166	0	36.6426	34.9926	0	0	0	0	0	0	0	0	35.0352	28.1356	0	0	0	0	0	23.8646	34.4836	31.3266	0	30.4976	35.7046	31.9446	0	27.4706	36.8296	0	27.8876	0	25.8556	0	0	34.7906
D4 GFP 6	0	28.2994	0	37.5224	41.1228	27.8444	0	0	0	0	0	0	35.0494	0	35.6914	0	32.4364	0	0	30.7804	0	0	0	0	0	33.1254	0	0	28.5724	0	0	0	34.5734	36.0684	0	36.7814	34.9154	0	0	0	35.0754	0	0	34.6444	0	0	0	0
D4 GFP 8	0	37.2299	0	38.5829	41.4761	36.2189	0	31.1249	31.3299	0	0	0	35.6279	0	36.0559	33.6729	34.4639	0	0	0	0	0	31.1139	0	35.0857	0	0	0	0	0	0	33.7479	34.7719	36.4319	0	35.0789	34.9629	0	0	33.6399	35.9679	35.1619	32.2379	31.7029	34.8809	0	0	31.8489
D4 GFP 9	0	39.168	0	43.82	43.485	0	0	34.193	0	0	0	0	34.794	0	36.785	37.338	39.249	39.391	0	31.269	0	39.123	36.67	0	37.159	0	0	0	34.716	0	0	36.479	37.847	34.328	0	37.826	39.126	0	35.22	36.231	39.132	35.721	0	35.545	36.562	0	0	36.734
D4 SSEA4 1	0	34.9426	0	22.0776	38.7955	0	0	25.9896	0	0	31.5886	32.1723	27.0216	0	28.0076	27.8556	31.5206	27.8196	30.7872	0	28.6896	33.0246	29.0036	0	29.8806	0	0	0	31.1196	0	0	0	28.6846	0	0	31.4176	31.1036	30.4046	0	29.6336	32.7226	30.0866	28.5786	0	32.2866	0	0	28.3426
D4 SSEA4 10	0	36.9851	0	38.5791	42.7537	0	0	0	0	0	0	0	31.9361	0	0	0	0	0	52.0469	0	30.0971	0	39.2391	0	0	33.5031	0	0	0	34.1561	0	0	0	32.7901	0	32.9961	37.4401	35.8881	0	33.4181	35.6721	0	33.4421	32.2671	32.4531	0	0	34.7791
D4 SSEA4 11	0	38.0871	0	35.8721	39.7544	0	0	0	0	0	29.8691	35.5762	28.8381	0	31.0801	32.5431	33.3441	31.6861	23.8375	0	28.9441	35.9991	33.1801	0	30.5141	29.0091	0	0	29.1521	0	0	0	31.5011	28.0441	0	32.0211	33.8661	33.1541	0	31.4621	33.0461	30.9451	26.9731	31.2351	33.2231	0	0	30.8511
D4 SSEA4 12	0	35.1518	0	34.4758	39.5192	0	0	0	0	0	0	0	0	0	0	0	33.8468	33.0508	27.9071	0	0	0	0	0	0	32.5698	0	0	0	0	0	0	0	0	0	32.6608	32.9458	0	0	0	0	0	0	31.8688	31.4328	0	0	0
D4 SSEA4 13	0	35.3711	0	35.9951	38.3195	0	0	0	0	0	0	34.102	27.2671	0	33.3921	31.1341	32.9091	0	31.3852	0	0	32.4381	33.0461	0	31.2201	0	0	0	0	0	0	0	0	27.8161	0	30.9871	31.3731	30.5911	30.6791	29.3331	32.9281	28.0501	0	0	31.3261	0	0	0
D4 SSEA4 14	0	37.0361	0	37.4541	38.8063	0	0	24.8371	0	0	32.4981	32.1994	30.2951	0	29.5141	30.6321	33.7921	31.2581	24.3312	0	0	36.5571	32.3611	0	30.3181	30.1861	0	0	0	31.3001	0	31.0231	31.8291	0	0	31.2981	31.6331	32.9181	30.8391	27.8811	33.5841	25.2271	28.3491	30.7441	31.5391	0	0	30.8461
D4 SSEA4 15	0	34.6412	0	33.3522	30.0118	0	0	0	29.9622	0	32.1752	22.8788	31.0832	0	30.0312	32.7732	0	30.5172	0	0	22.2592	28.1802	33.8452	0	0	25.0462	0	0	0	0	0	0	30.5712	0	0	32.9552	29.8772	0	0	32.1282	29.9082	31.3052	0	29.0132	32.1612	0	0	32.8382
D4 SSEA4 16	0	32.9954	0	36.6324	38.1947	0	0	0	0	0	0	25.6448	30.2054	0	32.0664	30.9734	0	30.7464	0	0	27.1624	0	33.0994	0	33.2764	28.4524	0	0	31.8244	0	0	0	33.8264	0	0	33.1054	34.1924	0	0	32.2844	33.9934	31.0864	32.0984	29.5804	33.8724	0	0	32.2154
D4 SSEA4 2	0	34.548	0	31.377	38.4176	0	0	0	26.729	0	0	32.7564	26.926	0	31.274	27.341	32.465	28.6	20.28	0	0	0	29.801	0	29.224	0	0	0	30.153	0	0	0	29.56	24.48	0	30.113	30.912	31.803	0	29.225	30.875	28.694	0	28.103	30.376	0	0	27.426
D4 SSEA4 3	0	34.1343	0	24.7023	41.7088	0	0	0	0	0	0	0	0	0	0	0	0	32.1073	0	28.5253	0	33.2573	33.7353	0	0	31.4063	0	0	0	0	0	0	0	27.5383	0	31.5703	0	0	0	0	34.1733	0	30.7993	0	30.3663	0	0	0
D4 SSEA4 4	0	34.2154	0	21.1244	37.0212	0	0	0	0	26.0544	30.3854	0	26.9624	0	29.7064	30.4534	28.8044	30.4304	29.774	0	0	27.1094	34.6434	0	30.7924	28.3624	0	0	24.5364	0	0	0	29.4444	26.8394	0	30.7364	33.2254	28.2534	22.4664	29.6814	32.6214	0	0	29.4874	30.4784	0	0	30.3964
D4 SSEA4 5	0	34.3128	0	37.0398	39.4391	0	0	0	29.4618	0	30.4698	0	29.8498	0	31.2518	31.2688	0	28.9328	0	24.1358	0	31.6338	34.0728	0	30.4358	0	0	0	30.4058	29.5818	0	0	30.6578	28.7038	0	30.7538	33.2298	34.4368	26.0888	30.3368	31.8098	0	29.0948	0	30.6478	0	0	28.0498
D4 SSEA4 6	0	34.4135	0	23.8105	39.4518	0	0	0	0	0	32.3325	0	0	0	30.3585	31.0165	27.8085	31.3045	31.0347	0	27.5645	32.1235	34.7925	0	31.4915	0	0	0	0	29.2925	0	30.0595	31.0675	25.9455	0	31.5385	33.1225	35.2245	29.0355	31.6435	32.8285	30.5105	29.4005	29.0635	31.9885	0	0	31.6225
D4 SSEA4 7	0	35.7732	0	0	41.2685	0	0	0	0	0	0	34.2499	30.1682	0	0	0	0	0	34.4505	0	33.4372	37.8582	0	0	32.7542	31.7682	0	0	0	0	0	0	0	30.0582	0	35.3052	34.9362	31.0252	34.3652	32.8402	34.5892	34.2762	31.3362	0	32.4272	0	0	33.0922
D4 SSEA4 9	0	0	0	36.7094	40.7465	0	0	0	0	0	34.7224	0	0	0	34.7554	34.8974	0	0	0	0	33.4694	0	33.6654	0	0	33.1764	0	0	33.1874	33.1814	0	0	0	29.7444	0	32.8724	34.3514	35.0274	34.2474	0	0	0	28.0014	0	31.9354	0	0	30.8164
D8 GFP 1	30.8584	35.5444	0	33.5984	33.6329	0	0	0	0	0	0	0	29.2314	0	0	0	0	0	0	0	0	0	33.4074	0	32.8584	0	0	0	0	0	0	0	0	0	0	34.4934	30.5054	0	0	0	0	30.1794	0	0	32.7004	0	0	30.6644
D8 GFP 10	0	31.2516	0	34.6866	31.5436	0	0	0	0	0	33.2776	0	28.8906	0	33.2466	32.7626	0	31.6356	0	28.5736	0	0	0	0	33.2946	28.6086	0	0	0	0	0	31.7016	32.9796	32.3046	0	33.6206	34.7596	0	0	32.5406	34.3796	31.2476	32.1856	34.0166	33.7086	0	0	31.3746
D8 GFP 11	0	37.0471	0	38.9451	37.5581	0	0	28.1631	31.2951	0	0	0	31.0771	0	34.5911	32.3731	30.2041	31.9001	0	27.1441	24.5221	31.0121	0	0	31.1261	28.5081	0	0	0	0	0	30.5071	32.3981	31.2681	0	33.0561	35.2641	31.9351	0	32.6901	33.8961	30.0211	27.9041	33.5051	33.0091	0	0	31.0771
D8 GFP 12	0	38.8919	0	39.5659	38.4059	0	0	28.7919	0	0	0	0	34.0709	0	35.4169	34.5909	0	0	0	32.2739	0	34.7859	0	0	33.2119	37.4569	0	31.8979	0	0	0	33.5659	34.5569	0	31.8269	34.5449	38.7709	0	0	31.3869	35.3909	33.2419	31.2269	32.9619	34.0459	0	0	32.0609
D8 GFP 13	0	39.8888	0	41.2588	40.2118	0	0	0	0	0	34.5428	0	32.6198	0	33.2388	33.6548	38.1308	36.2698	0	29.7458	23.8548	29.9818	0	0	34.2238	33.9198	0	0	31.2378	35.4078	0	33.4268	33.0738	32.9818	0	34.6808	39.1508	33.1588	0	34.7608	36.0748	32.0198	31.9328	35.4298	34.2348	0	0	31.0338
D8 GFP 14	0	44.6108	0	45.8688	45.7568	0	0	33.3378	0	0	38.1508	0	37.1088	0	38.0238	37.7298	38.2858	38.1108	0	32.5728	0	39.9978	0	0	36.6398	32.3158	0	0	0	0	0	37.9238	38.0808	36.7358	0	38.3528	40.1328	0	38.2618	35.8158	39.8178	36.5958	33.3888	35.9558	38.7398	0	0	35.9348
D8 GFP 15	0	39.4759	0	36.7159	38.3739	0	0	0	34.7529	0	36.4959	0	32.6499	0	33.4249	35.8799	32.1979	37.8459	0	29.8389	0	0	0	0	34.4069	34.2619	0	0	0	0	0	35.2669	33.2409	34.3419	0	35.4149	36.9319	28.3229	33.6719	33.6379	37.0389	30.5839	26.7199	36.6019	35.0719	0	0	30.4689
D8 GFP 16	0	37.9994	0	39.4804	37.9004	0	0	0	0	0	32.8914	0	30.6094	0	29.4264	33.5184	35.7344	34.1484	0	28.0884	31.8684	36.5594	0	0	33.5284	27.5164	0	0	0	34.4614	0	33.7134	32.9404	30.8204	0	34.3464	36.9444	0	32.3034	34.2684	34.1614	31.9224	31.0024	35.2164	33.3514	0	0	23.9074
D8 GFP 2	0	0	0	38.8077	44.4121	0	0	0	0	0	32.1937	0	31.8567	0	35.0777	35.2187	35.8307	0	37.1468	31.0537	33.9727	35.0917	34.1337	0	33.5597	29.9917	0	0	34.4397	33.5907	0	34.5757	33.2257	27.2167	31.4717	35.3647	36.8227	0	0	35.0997	35.5407	30.5377	0	0	31.9667	0	0	31.9627
D8 GFP 4	0	33.7755	0	36.2495	39.2173	0	0	26.1865	30.6935	0	32.4805	0	30.2705	0	31.7525	31.8985	0	31.8145	0	0	28.6245	0	30.1175	0	32.7355	0	0	0	31.5575	31.6975	0	30.7235	0	29.0945	0	31.3255	33.0575	0	0	31.8585	33.0565	29.8685	0	31.0655	31.1665	0	0	28.7615
D8 GFP 5	0	36.548	0	35.182	36.1512	0	0	0	29.323	0	34.345	0	29.655	0	31.67	32.242	30.532	30.545	0	26.159	0	0	32.312	0	32.361	30.712	0	0	27.877	0	0	30.308	29.665	27.586	0	31.311	33.154	0	0	30.182	34.605	29.682	23.334	28.593	31.517	0	0	29.791
D8 GFP 6	0	0	0	34.844	36.7858	30.239	0	27.294	30.074	0	32.002	0	31.66	0	33.323	33.082	29.178	32.676	0	0	26.961	0	28.488	0	33.454	27.253	0	0	33.754	0	0	31.384	31.616	31.108	0	33.404	32.909	0	29.959	32.727	34.842	32.549	34.064	31.133	33.106	0	0	29.598
D8 GFP 7	0	35.2606	0	37.1326	42.0788	34.6716	0	29.0126	32.8956	29.2196	33.4606	0	32.8526	0	33.2436	33.9486	0	32.7356	0	0	0	0	0	0	33.6066	28.5436	0	0	32.2156	31.9856	0	33.2736	33.5776	32.7686	0	33.9536	34.7656	0	0	31.5296	35.7236	0	0	28.5246	34.3376	0	0	31.9166
D8 SSEA4 1	0	33.6963	0	35.3443	40.5173	0	0	0	31.3833	0	0	0	0	0	32.3433	31.3743	0	0	34.1964	0	0	0	0	0	0	0	0	0	0	31.1493	0	0	32.4783	0	0	29.8763	0	29.6403	0	31.7473	0	0	30.8703	0	0	0	0	0
D8 SSEA4 10	0	39.0416	0	39.3466	45.6812	34.4996	0	0	32.7646	0	0	0	0	0	33.7736	32.6906	33.4056	0	0	0	34.2186	37.4326	32.2066	0	0	34.4016	0	0	0	34.5746	0	34.2556	0	32.2016	0	35.6056	36.0386	33.1936	0	34.8146	35.1966	0	34.2266	33.6346	34.7996	0	0	35.2116
D8 SSEA4 11	0	39.5517	0	37.0187	38.7091	0	0	31.5217	0	0	0	0	0	0	0	0	0	0	0	0	0	0	33.1897	0	32.5727	0	0	0	0	0	0	0	0	0	0	32.9427	35.1257	0	0	0	34.6687	0	34.5757	0	31.5077	0	0	0
D8 SSEA4 12	0	36.6271	0	34.5791	35.0536	0	0	28.2421	0	0	0	0	28.8611	0	0	34.2721	0	30.9751	29.983	0	0	33.6731	30.4561	0	30.7731	0	0	0	0	0	0	0	31.3981	32.2981	0	33.2061	31.8821	31.5821	0	30.6511	33.9731	30.9121	0	30.5321	33.0161	0	0	0
D8 SSEA4 13	0	37.0859	0	34.2779	39.6324	0	0	27.5539	30.6499	0	0	33.0605	29.1649	0	30.4849	31.7939	0	30.1379	29.8941	26.2269	0	34.9869	32.1969	0	31.2099	0	0	0	0	27.7199	0	31.6229	30.1989	27.6629	0	32.6349	33.5379	30.6909	0	29.8979	33.0569	28.7469	25.4029	31.2519	32.5839	0	0	29.6429
D8 SSEA4 14	0	37.5495	0	37.7095	41.8235	0	0	27.4405	31.4265	0	33.6915	0	30.3725	0	29.2005	31.8845	0	28.9335	0	0	28.8825	34.9135	32.8225	0	31.3865	0	0	0	31.5135	0	0	30.3595	31.1035	32.3835	0	31.5045	33.1985	29.7485	0	31.7385	33.8615	29.7725	28.4865	29.4615	32.0455	0	0	31.5835
D8 SSEA4 15	0	38.4658	0	38.6848	40.6579	0	0	0	31.7338	0	0	0	31.0288	0	0	31.3208	32.1698	0	36.3919	28.5608	0	0	30.5248	0	32.7718	31.7748	0	0	0	0	0	32.1218	33.3738	33.4868	0	32.8248	35.6048	34.8498	0	33.1168	33.6578	0	30.2728	32.0988	32.4178	0	0	30.5628
D8 SSEA4 16	0	35.0778	0	33.9818	36.7389	0	0	28.5308	30.5508	0	31.6318	30.7121	31.9628	0	31.4518	31.1128	30.3608	32.3028	0	0	28.6258	28.6608	33.8048	0	29.8878	29.6818	0	0	30.9458	0	0	31.6918	33.1568	27.6508	0	32.3668	33.9218	29.9138	0	30.7138	32.0518	30.6088	0	31.6158	33.6378	0	0	0
D8 SSEA4 2	0	35.4562	0	34.3162	42.3594	0	0	0	0	0	31.2332	0	29.3472	0	0	30.4442	29.9112	28.8362	30.9389	0	0	34.6582	33.1132	0	30.3952	0	0	0	0	0	0	29.1402	31.9342	29.6602	0	31.6812	33.0512	31.8622	0	30.3352	31.8052	30.2602	23.9872	31.1202	30.6912	0	0	31.1292
D8 SSEA4 3	0	36.7418	0	36.6558	42.1662	0	0	27.2028	27.2928	0	32.6318	34.844	30.8578	0	30.0988	29.2318	29.7608	30.3518	0	24.9668	0	32.7538	30.3818	0	31.0188	0	0	0	29.4428	0	0	31.1598	32.0598	27.9188	0	32.0178	33.1558	30.1788	0	29.2918	33.1738	29.2758	0	30.1558	30.8708	0	0	29.4948
D8 SSEA4 4	0	35.8302	0	37.0392	40.6558	0	0	28.4742	27.4642	0	30.8342	34.8012	30.6952	0	0	30.2542	32.3882	0	0	0	28.0852	35.4022	31.7952	0	29.7942	0	0	0	0	0	0	27.6072	30.1942	26.1892	0	30.5742	34.3422	0	30.4992	29.0282	33.2072	0	0	29.0652	30.7862	0	0	30.8842
D8 SSEA4 5	0	0	0	37.8148	40.1951	0	0	0	0	0	0	0	30.6658	0	0	0	0	0	0	30.0878	32.0338	33.6818	29.3558	0	0	34.6188	0	0	26.7368	34.2428	0	0	33.3648	30.5038	0	33.7128	34.3508	0	0	32.2868	0	0	30.8868	0	32.4768	0	0	0
D8 SSEA4 6	0	36.1454	0	35.9204	42.4656	0	0	27.4864	29.0714	0	0	31.1469	30.0294	0	31.4784	29.2974	32.9294	31.5284	23.6829	0	0	35.2174	33.6084	0	30.7124	24.0504	0	0	0	29.1174	0	29.6974	29.7984	27.5524	27.6994	31.1694	33.1294	30.1094	0	30.0834	31.5014	30.6914	0	30.3974	31.3074	0	0	30.7444
D8 SSEA4 7	0	34.7686	0	35.8626	41.7663	0	0	0	0	0	30.4086	0	28.8686	0	0	31.6476	28.9556	33.3886	0	0	0	35.7436	32.9836	0	29.6276	0	0	0	29.5136	29.0346	0	29.7466	30.2416	30.5596	0	30.6646	31.7766	30.5006	30.5526	30.5466	32.3976	29.2346	0	32.5206	29.1846	0	0	28.6286
D8 SSEA4 8	0	35.3459	0	37.7999	41.1443	0	0	0	29.2629	0	31.6219	0	28.3899	0	31.6579	0	31.5619	30.9459	26.2994	0	29.1529	33.5029	34.7539	0	31.9159	30.3869	0	0	0	0	0	0	32.2919	28.9989	0	32.8199	32.6309	31.8369	0	30.9039	33.1789	0	0	27.7899	28.2749	0	0	30.7679
D8 SSEA4 9	0	34.5588	0	36.8378	39.1403	28.6658	0	0	0	0	32.1898	31.5008	30.8438	0	32.2718	30.7048	0	31.2148	0	22.0608	0	0	29.9288	0	28.4048	0	0	0	0	0	0	0	32.2228	28.2748	0	32.3878	33.4828	32.6188	29.8278	31.1428	32.9748	31.3508	0	30.4418	31.9938	0	0	31.4128
H9 hESC 1	0	0	34.0383	0	35.1203	37.4533	0	0	0	0	0	0	28.9953	0	34.1903	0	0	0	26.7458	0	33.9643	0	0	0	32.5763	0	0	0	0	38.9263	0	0	0	0	0	33.2443	35.0903	0	36.3753	33.5023	0	0	26.9783	0	34.6293	34.0763	0	0
H9 hESC 10	0	34.1692	33.8402	0	31.5898	37.2312	0	28.7202	29.7792	0	0	0	31.5312	29.5782	36.5912	30.4112	0	31.1662	0	25.9172	33.7952	31.8042	29.6302	0	33.9452	33.7602	0	34.1822	23.1402	38.0502	0	32.9962	32.1872	31.8432	32.3342	34.2252	34.7022	0	36.9512	32.7812	34.1432	33.0832	33.9792	0	34.8832	34.4532	30.5412	33.6742
H9 hESC 11	0	32.6035	36.8125	35.6695	36.4045	38.3175	0	29.8755	0	0	0	0	31.2105	0	36.4675	34.2445	31.1525	33.0755	0	32.1085	34.8255	0	0	0	33.9895	35.4725	0	0	37.4605	38.8345	0	31.1725	32.4245	0	33.5785	34.6775	33.6895	0	36.1615	33.4335	0	32.8675	34.3385	0	35.6405	34.8755	32.5145	34.2535
H9 hESC 12	0	34.8482	33.4432	0	30.0318	37.2292	0	0	0	0	32.1472	0	32.6162	0	35.0042	31.5532	31.7222	32.0912	0	25.2052	32.6282	31.5632	29.4672	0	32.5242	32.4972	0	33.4792	35.8882	38.5252	0	33.0972	34.0602	31.1712	33.1712	34.6042	34.5012	0	35.5422	32.3152	32.3152	31.2542	33.4212	0	34.0742	33.5382	27.0972	32.5082
H9 hESC 13	0	34.448	34.368	0	31.1413	37.424	0	29.238	0	0	0	0	32.127	0	34.103	33.246	30.857	31.331	0	27.532	34.523	0	0	0	33.024	32.6	0	32.974	36.2	38.061	0	33.721	33.867	0	32.486	34.313	34.251	0	36.366	31.592	33.11	30.515	34.424	0	33.966	34.591	31.155	33.551
H9 hESC 14	0	36.8342	30.6242	34.6262	31.3835	35.4162	0	0	32.7912	0	32.9542	0	33.0582	0	36.8012	33.0482	0	31.4182	39.2599	36.3882	33.6472	0	0	28.6982	32.3212	35.3472	0	31.5972	35.7282	39.0002	0	33.4892	33.6292	31.3402	32.6882	34.2242	35.0682	0	35.9342	31.4802	32.2732	32.1302	34.1672	0	33.6232	33.3902	29.0442	33.4692
H9 hESC 15	0	34.7519	36.7969	0	29.743	35.0009	0	27.0399	30.9759	0	0	26.804	31.8179	0	34.1029	32.4299	30.3299	31.4229	0	0	33.3779	0	0	25.9979	32.9799	34.3859	0	0	33.3239	38.6459	0	31.4429	32.8449	31.0309	32.2559	34.1059	32.7619	0	31.9729	32.5869	32.2529	32.8229	32.6509	0	34.0189	34.4789	30.5359	33.4449
H9 hESC 16	0	33.4876	33.3386	0	29.9596	36.9556	0	23.8236	0	0	0	0	32.4156	0	35.6826	32.5966	30.8076	31.5716	34.888	27.5976	34.2156	0	0	0	32.3206	35.1856	0	29.7616	35.8296	37.9106	0	33.1226	33.3656	30.8356	33.2646	34.4166	34.0586	29.2556	34.4526	32.0856	32.6566	33.1956	34.1666	29.5446	34.7606	33.6296	0	32.2216
H9 hESC 2	0	34.8106	34.1386	0	30.8518	36.9956	0	27.1896	28.7506	0	30.4606	0	32.0016	0	35.9216	32.5656	31.4116	30.9876	31.7787	30.1946	33.7346	0	0	0	33.1336	34.7786	0	30.7436	36.3476	38.5306	0	32.7986	33.5606	30.8716	32.9686	34.6056	34.2706	27.6086	34.9986	32.6616	32.3526	32.0906	33.7956	0	34.7266	33.6346	31.5606	31.4956
H9 hESC 3	0	34.9023	35.8543	0	30.6329	36.9223	0	0	0	0	0	0	31.9723	0	34.2693	31.2433	0	31.4753	0	0	33.0463	0	0	0	32.3863	32.8383	0	32.6493	35.4603	38.2953	0	33.3753	34.3153	29.6733	33.3663	34.3783	33.6943	0	37.5413	31.9293	33.1003	32.0663	33.8493	0	34.2313	33.1693	31.3993	32.6513
H9 hESC 4	0	34.6878	35.2488	0	29.0549	35.0678	0	0	0	0	22.5988	0	30.7338	0	34.7308	32.4848	0	30.5568	30.6576	26.4698	32.6528	0	0	26.9048	32.2308	35.1998	0	0	33.8608	38.2358	0	31.4898	30.3358	28.7658	31.7918	34.1188	32.5708	0	33.0578	31.7058	31.7908	31.9898	33.0338	0	34.0708	33.0098	30.8638	33.3428
H9 hESC 5	0	34.0973	34.3223	28.7173	29.1162	37.2173	0	27.2813	29.5903	0	0	0	31.9023	28.3563	35.5443	33.2603	29.3873	30.1043	29.2821	25.4293	34.0283	29.0503	26.4293	0	33.0303	33.3533	0	34.2193	35.6283	38.2033	0	32.6403	32.7773	29.8893	34.4563	34.2613	33.9093	0	36.4943	32.3383	32.1933	32.7953	33.2713	0	34.1963	34.4003	29.5363	33.0143
H9 hESC 6	0	33.5256	34.3326	28.4696	29.9993	37.9466	0	0	29.2726	0	0	0	32.5426	0	34.4456	32.4926	29.7546	30.4556	29.8736	0	32.7596	0	0	0	32.8966	34.5726	0	32.0666	35.8606	37.8596	0	32.8786	32.9336	31.0806	33.7326	34.2246	33.5686	0	35.1066	31.4206	32.0896	31.4656	34.2476	30.0116	34.8006	33.8856	29.0266	32.8306
H9 hESC 7	30.4676	34.8236	36.8006	35.9186	32.7596	38.6956	0	0	0	0	0	0	32.2816	31.0226	37.6016	32.1426	34.5656	33.5646	30.8019	27.6716	35.9926	32.5056	30.2966	0	33.5146	34.1806	0	36.2306	34.2806	40.2176	0	34.0416	35.1016	31.6526	34.5906	36.3916	36.5906	0	37.9076	35.4336	0	33.8166	34.5196	0	34.6346	34.5236	31.9936	35.3086
H9 hESC 8	0	33.7969	34.2849	0	29.9481	37.2539	0	27.1269	30.4219	0	0	0	31.8429	28.9409	35.1819	32.8149	0	0	30.977	29.3289	33.6489	0	0	0	32.3399	34.3789	0	31.5319	34.7379	38.1349	0	32.7889	33.6439	30.1469	33.4079	34.6049	32.9279	0	36.1129	32.7089	32.2289	32.4349	34.3359	0	34.5159	33.9949	31.6239	32.0649
H9 hESC 9	0	34.7961	34.3761	30.5071	29.6588	36.9781	0	27.1211	28.9571	0	0	24.2894	30.5941	27.9371	36.0821	33.5621	0	29.2691	37.5429	30.5681	33.5421	31.7351	30.1631	0	32.8271	34.5121	0	32.3821	34.9531	38.6541	0	33.7981	33.5051	28.2841	33.8011	34.6471	32.9771	0	35.6971	32.3241	33.0951	31.3461	34.7681	28.7551	34.3821	35.2171	32.7751	32.5341
